# Supplementary material for: A qualitative study of patients’ perceptions and priorities when living with primary frozen shoulder
Source: PubMed Central journal article supplement — BMJ Open. 2013 Sep 26;3(9):e003452. doi: 10.1136/bmjopen-2013-003452 (PMC3787409; doi:10.1136/bmjopen-2013-003452), 2013-09-26
Supplement: bmjopen-2013-003452.draft_revisions.pdf [file bmjopen-2013-003452.draft_revisions.pdf]

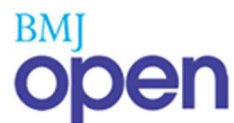

**A qualitative study of patients' perceptions and priorities  
when living with primary frozen shoulder**

|                                    |                                                                                                                                                                                                                                                                                            |
|------------------------------------|--------------------------------------------------------------------------------------------------------------------------------------------------------------------------------------------------------------------------------------------------------------------------------------------|
| Journal:                           | <i>BMJ Open</i>                                                                                                                                                                                                                                                                            |
| Manuscript ID:                     | bmjopen-2013-003452                                                                                                                                                                                                                                                                        |
| Article Type:                      | Research                                                                                                                                                                                                                                                                                   |
| Date Submitted by the Author:      | 21-Jun-2013                                                                                                                                                                                                                                                                                |
| Complete List of Authors:          | Jones, Susan; Teesside University, Health and Social Care Institute<br>Hanchard, Nigel; Teesside University, Health and Social Care Institute<br>Hamilton, Sharon; Teesside University, Health and Social Care Institute<br>Rangan, Amar; The James Cook University Hospital, Orthopaedics |
| <b>Primary Subject<br>Heading</b>: | Qualitative research                                                                                                                                                                                                                                                                       |
| Secondary Subject Heading:         | Patient-centred medicine                                                                                                                                                                                                                                                                   |
| Keywords:                          | Shoulder < ORTHOPAEDIC & TRAUMA SURGERY, Musculoskeletal disorders<br>< ORTHOPAEDIC & TRAUMA SURGERY, PAIN MANAGEMENT                                                                                                                                                                      |
|                                    |                                                                                                                                                                                                                                                                                            |

SCHOLARONE™  
Manuscripts

Peer review only

A qualitative study of patients' perceptions and priorities when living with primary frozen shoulder  
FINAL MAIN DOCUMENT (article summary, body of text, acknowledgements, references)  
BMJ Open

Jones, Susan; Hanchard, Nigel; Hamilton, Sharon; Rangan, Amar

## Abstract:

**Objectives:** To elucidate patients' perceptions of, and treatment priorities for, frozen shoulder.

**Design:** Qualitative study design using semi-structured interviews.

**Setting:** GP and musculoskeletal (MSK) clinics in primary and secondary care in one NHS Trust in England.

**Participants:** Twelve patients diagnosed with primary frozen shoulder were purposively recruited from a GP surgery, community clinics and hospital clinics. Recruitment targeted the phases of frozen shoulder: pain predominant (n=5), stiffness predominant (n=4), and residual stiffness predominant following hospital treatment (n=2). One participant dropped out. **Inclusion criteria:** Adult, male and female patients of any age, attending the clinics, who had been diagnosed with primary frozen shoulder.

**Primary and secondary outcome measures:** not appropriate.

**Results:** The most important experiential themes identified by participants were: pain which was both severe and inexplicable; inconvenience/disability arising from increasing restriction of movement (due to pain initially, gradually giving way to stiffness); confusion/anxiety associated with delay in diagnosis and uncertainty about the implications for the future; and treatment-related aspects. Participants not directly referred to a specialist (whether physiotherapist, physician or surgeon) wanted a faster, better-defined care pathway. Specialist consultation brought more definitive diagnosis, relief from anxiety, and usually self-rated improvement. The main treatment priority was improved function, though there was recognition that this might be facilitated by relief of pain or stiffness. There was a general lack of information from clinicians about the condition with over-reliance on verbal communication and very little written information.

**Conclusions:** Awareness of frozen shoulder should be increased among non-specialists and the best available information made accessible for patients. Our results also highlight the importance of patient participation in frozen shoulder research.

**Trial registration:** not appropriate.

## Article Summary

### *Article focus*

- The experiences and perceptions of people living with primary frozen shoulder, and their priorities for treatment.

### *Key messages*

1 A qualitative study of patients' perceptions and priorities when living with primary frozen shoulder  
2 FINAL MAIN DOCUMENT (article summary, body of text, acknowledgements, references)  
3 BMJ Open

- 4 • Primary frozen shoulder causes severe pain and restricts activities of daily  
5 living. Incorrect or delayed diagnoses often amplify patient anxiety and hold  
6 up treatment.
- 7 • Care pathways are needed with prompt diagnosis and access to specialist (or  
8 informed) care. Raising awareness of the diagnostic criteria and management  
9 options among non-specialist healthcare staff—especially GPs and  
10 physiotherapists—should make this more achievable.
- 11 • Translation of evidence to the target audience of non-specialist healthcare  
12 professionals is a priority.

### 13 *Strengths and limitations of this study*

14 To our knowledge, this was the first study to capture the experiences of patients with  
15 frozen shoulder.

16 Patients were recruited from care settings representative of those where the  
17 condition is typically managed. However, the number of participants was small and  
18 data saturation was not achieved, so the findings must be considered indicative  
19 rather than conclusive. In addition, two participants' experience of frozen shoulder  
20 was retrospective. Compared to recent cases, their contributions are likely to be  
21 more open to recall bias, and to reflect less current, earlier approaches to care.

22 Nevertheless the design included trustworthy methods with clear reporting, allowing  
23 readers to make their own judgement on trustworthiness. As the work published on  
24 this topic is very limited this article makes a valuable contribution.

## 25 **INTRODUCTION**

26 Frozen shoulder (FS) is a condition affecting the capsule of the shoulder joint, and is  
27 characterised by inflammation and contracture.<sup>1</sup> As reviewed by Hand et al<sup>1</sup> and  
28 Kelley, McClure and Leggin,<sup>2</sup> these events may occur for no identifiable reason in  
29 "primary" or "idiopathic" FS or in association with, or secondary to, some other event  
30 or condition in "secondary" FS. However some authorities label frozen shoulder  
31 associated with diabetes—a known risk factor<sup>3</sup>—as a "primary" type.<sup>4</sup>

32 The prevalence of those seeking help for primary frozen shoulder (FS) has been  
33 estimated as 2 to 5%;<sup>1</sup> while in the general working-age population, a large survey  
34 has estimated prevalence as high as 10%.<sup>5</sup> The healthcare implications of primary  
35 FS are considerable. In the UK, for example, based on a single GP consultation for  
36 each case, it costs the National Health Service at least £44.1 million (assuming a  
37 prevalence of 2%) or £110.3 million (assuming a prevalence of 5%). And since the  
38 usual age at onset is 40-60 years,<sup>6</sup> which is typically within the working-age range,  
39 there is a crucial economic impact on individuals and society.

40 Codman, who coined the term frozen shoulder, described the typical clinical  
41 manifestation as early as 1934:

42 "The condition [comes] on slowly; pain usually felt near the insertion of the  
43 deltoid; inability to sleep on the affected side; painful and incomplete elevation  
44 and external rotation; restriction of both spasmodic and mildly adherent type;

A qualitative study of patients' perceptions and priorities when living with primary frozen shoulder  
FINAL MAIN DOCUMENT (article summary, body of text, acknowledgements, references)  
BMJ Open

atrophy of the spinati; little local tenderness; X-rays negative except for bone atrophy.”<sup>7</sup>

However, the location of pain may be variable<sup>6</sup> and diagnosis may present a challenge, particularly for the non-specialist, and particularly in the early stages, when the signs are not pronounced: not least because false positive responses to standard tests for shoulder impingement (Neer's sign, Hawkins' test) are to be expected.<sup>8</sup> Recognising FS as phasic in nature, the recent UK guidelines for diagnosis, assessment and physiotherapy management of FS recommend a simple dichotomous “pain predominant” or “stiffness predominant” classification, whereby the patient is the arbiter of the stage, and pain takes precedence when there is ambiguity.<sup>8</sup>

Potential interventions include watchful waiting, physiotherapy, steroid injection, distension arthrography, manipulation under anaesthetic (MUA) and arthroscopic capsular release.<sup>4,8</sup> There is some evidence for specific interventions, although none of this is strong,<sup>5,9</sup> and not all observational series have verified the certainty of complete recovery. For example, in a recent study of 223 patients with FS referred to tertiary care, 38% had persistent mild symptoms, mostly pain, at a mean follow-up of 4.4 years (range 2 to 20 years). In 3% the persistent symptoms were severe, with pain and functional deficits.<sup>10</sup>

Despite a general appreciation that the condition imposes a serious burden on sufferers, the research literature demonstrates a lack of interest in the subjective experience of FS and patients' priorities for treatment. A recent systematic review commissioned by the UK Department of Health found no studies on patients' views of treatment.<sup>4</sup> This paucity is surprising, as there is evidence to show that patients' attitude towards treatment significantly affects adherence, including in musculoskeletal (MSK) conditions.<sup>11</sup> Therefore it is important to consider the patient perspective when assessing overall treatment effectiveness.<sup>11</sup> This has become increasingly relevant with the move towards a patient-centred paradigm of healthcare.<sup>11</sup> This paper seeks to provide a qualitative exploration of patients' experiences and perceptions of living with primary FS.

## METHODS

A qualitative study design employing semi-structured interviews was used to explore the experiences, priorities and perceptions of those experiencing the different phases of primary FS. Primary FS was chosen as the inclusion of secondary FS might have resulted in excessive heterogeneity.

### Participants

#### *Inclusion criteria*

Adult, male and female patients of any age, with or without diabetes, who had been diagnosed with primary FS by the following criteria:

- shoulder pain for at least one month;
- reduction in passive external rotation of 50% or more compared to the contralateral side<sup>12</sup> with a clinically significant change in end-feel;
- no clinical suspicion of other pathologies that might present similarly; and
- normal X-rays (only if clinically indicated).

1 A qualitative study of patients' perceptions and priorities when living with primary frozen shoulder  
2 FINAL MAIN DOCUMENT (article summary, body of text, acknowledgements, references)  
3 BMJ Open

### 4 **Recruitment**

5 Recruitment occurred in community and hospital settings. Clinical members of the  
6 research team who recruited participants from the community worked in a general  
7 medical practice; however in addition to their own surgery clinics they also recruited  
8 from clinics that they ran in collaboration with other specialist doctors and  
9 physiotherapists, which were spread across the community. The patients recruited  
10 from the hospital-based clinics had been referred to specialist services.

11 A purposive sample of patients with a story to tell<sup>13</sup> was selected by the clinicians,  
12 who were given a standard protocol to use, which provided basic details of the study  
13 and what would be required of participants. Patients were given an introductory pack  
14 which included an information sheet and contact details, requesting that they  
15 respond directly to the research team. When a potential participant contacted the  
16 team they were given the opportunity to ask any questions prior to arranging an  
17 interview.  
18  
19

### 20 **Sampling**

21 While our participants were not chosen as a representative sample, efforts were  
22 made to select men and women from a broad age range, and in the different phases  
23 of FS defined by the UK guidelines,<sup>8</sup> taking into account that they may be in primary  
24 or secondary care. Thus group 1 comprised patients in the pain predominant phase  
25 and was drawn exclusively from community care; group 2 were in the stiffness  
26 predominant phase, drawn from both community and secondary care (i.e. the  
27 hospital setting); and group 3, were in the residual stiffness predominant phase  
28 following hospital treatment, and drawn exclusively from secondary care.  
29  
30

### 31 **Data collection**

32 Interviews took place on NHS or University premises or by telephone. Each  
33 commenced by establishing informed consent. Interviewees were then allowed the  
34 opportunity to give detailed descriptions of their experiences, with individual  
35 interviews lasting approximately 30-45 minutes. Schedules comprising the topics to  
36 be covered and a range of prompts relating to specific issues of interest were used  
37 to guide data collection during interviews. Questions related to the particular phase  
38 currently experienced by participants but also included questions about the previous  
39 phase, where applicable. The interviews mainly comprised open questions to  
40 encourage the participants to tell their stories. Field notes were made of  
41 observations outwith the transcripts. Credibility was demonstrated by confirmation of  
42 information from multiple participants leading to identification of common themes.  
43 Interviews were audio recorded with the permission of participants and later  
44 transcribed.  
45  
46  
47

48 Interviews, transcription and subsequent data checking were undertaken by  
49 researchers with a nursing background and experience in qualitative research (SJ,  
50 SH). These researchers were ideally placed, firstly because their core professional  
51 role is not directly involved in FS management (this facilitated objectivity); and  
52 secondly because their clinical backgrounds gave them insights into the nuances of  
53 patient-healthcare provider relationships.  
54  
55  
56  
57  
58  
59  
60

A qualitative study of patients' perceptions and priorities when living with primary frozen shoulder  
FINAL MAIN DOCUMENT (article summary, body of text, acknowledgements, references)  
BMJ Open

## Data analysis

An inductive approach to analysis was taken, using a constant comparative method. Data were analysed after each interview and the findings informed the questions and topics for subsequent interviews. The data were independently analysed by two researchers using the six stage thematic approach outlined by Braun and Clarke.<sup>14</sup> An in-depth familiarisation with the data was followed by the generation of initial codes, using Nvivo 9, which were then applied to the data and collated into potential themes independently by the researchers. These themes were then reviewed, generating a thematic map of the analysis. In the next stage the themes were refined and named. Finally, examples were selected to illustrate the thematic framework.

## RESULTS

### Participants

Data collection occurred between July 2011 and November 2011. Twelve participants were recruited, and eleven agreed to be interviewed. Five met the criteria for group 1, four for group 2 and two for group 3. They included six women and five men, aged from 40 years upwards, predominantly in their fifties (n=7). Three of the men had diabetes and formed the younger end of the group, with two in their forties and one in his early fifties. Three participants had experienced FS in both shoulders (though none on both sides concurrently). One participant may have experienced FS in both shoulders, but could not remember the diagnosis given for the first-affected shoulder. One participant had a previous history of impingement (not FS) in the contralateral shoulder and appears to have started with the same diagnosis in the instance recorded here, which then developed into a FS. Two of the participants had suffered with FS several years ago and were recruited as their history was known to the physiotherapist.

### Contexts of participant journeys

One participant consulted a GP one week after the start of symptoms but all the others waited six to eight weeks before presenting for a consultation. After initial presentation they followed various paths towards specialist treatment. Some participants experienced significant delay in receiving a definitive diagnosis and specialist (i.e. MSK or shoulder specialist) care.

### Thematic analysis

Four major patient-reported themes associated with FS were identified and are shown in the thematic map (Figure 1).

### Figure 1: THEMATIC MAP - HERE

#### *Theme 1: Pain*

Patients reported that the pain would start quite suddenly and gradually worsen over weeks and months. During the initial (pain predominant) phase the pain would be very intense on certain movements, typically stretching or reaching in specific directions. Unguarded movement, in particular, caused severe pain. Also, sleep was badly disturbed. Once awake, participants struggled to get back to sleep due to constant, "nagging" pain. Sleep deprivation wore participants down, even though they reported taking a resilient approach. In an attempt to manage their pain, participants tried to avoid painful movements, applied ointments and took

1 A qualitative study of patients' perceptions and priorities when living with primary frozen shoulder  
2 FINAL MAIN DOCUMENT (article summary, body of text, acknowledgements, references)  
3 BMJ Open

4 medication. The nature of the pain was such that they worried about what could be  
5 the cause.

6 "The amount of pain that I was in, I didn't believe that it was just a frozen  
7 shoulder." Participant 12

8  
9 Finding a way to deal with the pain and carry on with life as normally as possible was  
10 very important to participants.

### 11 **Theme 2: Inconvenience/disability**

12 Typically the FS lasted from one to three years. In a group of people who were  
13 usually active, this was hugely disruptive. The inability to use the arm normally,  
14 initially due to pain, gradually giving way to stiffness, affected even very fundamental  
15 activities of daily living (ADL), including, among others, hair washing and styling,  
16 getting out of a bath, dressing, reaching into a back pocket, opening a door, pegging  
17 washing out, washing up and other housework, home maintenance jobs, lifting a  
18 kettle, cutting up food, pulling a suitcase or wheeled shopping basket, gardening  
19 and, when driving, changing gear or positioning for reversing. In order to continue to  
20 drive, one participant had to buy a car with automatic transmission.

21 "Try getting out the bath 'cause you can't find a way up. You just cannot find a  
22 way to get out the bath! We've got bars on the side of the bath anyway but I  
23 couldn't find a way. I just had to snake over the side sometimes." Participant 7

24  
25 Participants who worked had to change their work routines to accommodate their  
26 limitations; one, for whom this was not possible, had to resign

27  
28 A general observation was that the pain and these major impairments in ADL  
29 occurred without obvious outward signs, so that much of the suffering involved was  
30 hidden from the casual observer. This led to much less sympathy than would be the  
31 case with many conditions.

32 " ... unless you have or have had a frozen shoulder you don't know how painful  
33 it is. It is really excruciating." Participant 8

34  
35 In general, so long as the FS was seen as temporary and benign, and they could  
36 care for themselves and keep their jobs until they recovered, participants accepted  
37 their situation; at the same time, they hoped for the earliest possible resolution.

### 38 **Theme 3: Awareness and expectations**

39 Participants did not successfully self-diagnose their problem. Typically they thought  
40 they had 'pulled something', anticipating that it would resolve in a week or two.  
41 Diagnosis also presented a challenge amongst non-specialist healthcare staff.

42  
43 "I made an appointment at the doctors and the doctor, having examined me,  
44 said, 'you are lucky it isn't a frozen shoulder, I think that what you have done is  
45 you have trapped a nerve, you have some slight nerve damage, you just need  
46 to rest, it will take a couple of months.'" Participant 5

A qualitative study of patients' perceptions and priorities when living with primary frozen shoulder  
FINAL MAIN DOCUMENT (article summary, body of text, acknowledgements, references)  
BMJ Open

Lack of diagnosis or misdiagnosis led to diverse consequences among the participants e.g. anxiety; denial; and delays in definitive diagnosis and referral. Participants were often left with unanswered questions, uncertainty as to the treatment options and the potential risks and benefits of treatment and, occasionally, with contradictory advice.

"... you want to know where the final outcome is going to be rather than you suffering week in week out thinking, 'when is it going to end? Fed up with this.' Whereas when you know it is going to last 3 or 4 years down the line, I know it is not going to be forever. Whereas you don't know anything; God, is this ever going to go away? I think I would like to know from the start." Participant 11

"I don't know whether I wasn't saying the right things to [my GP] or what .... I don't know whether it is my relationship with the doctor or what, but I don't ... I'm not very good, if they are vague and I don't understand what they are talking about, I won't sit there any longer, I'll, I'll leave. All I wanted was an answer." Participant 12

Participants who did not receive early informed or specialist care would have preferred a quick, clear pathway; and although they understood the difficulty of diagnosis, some expressed disappointment that they had suffered, for what seemed to them, longer than necessary, due to a lack of awareness of the condition on the part of their healthcare providers

"With the shoulder, I was saying, 'it's still hurting' and they [the GPs] were saying 'we'll look to see what else it is then.' Every time, something came back as, 'no, it's negative. Have you got any neck problem, shoulder problem, anything like that?' No arthritis, no swelling in it ... but every time it come back no, you are thinking, now what?" Participant 7 [first-affected shoulder, 2004]

#### **Theme 4: Treatment**

Participants identified functional outcomes e.g. freedom of movement as their main priority from treatment; however they recognised that if the pain or stiffness remained they would be unable to recover the movement. On presentation at the GP's surgery, reflecting the lack of a definitive diagnosis in most cases, there was no standard course of treatment offered. Two participants came via their occupational health physiotherapy services then to their GPs. Neither of them received a diagnosis of FS either. Some GPs opted to wait and see and most prescribed analgesics. As time passed some offered further investigations and/or administered further first-line treatment themselves, while others referred patients to an on-site physiotherapist, or to a primary or secondary care MSK clinic.

The range of first-line treatments experienced by the participants from their GPs included ointment, medications and local injections. On referral to the physiotherapist, treatment might include advice and education, hands-on passive mobilisation, exercises, local injections, heat, massage, ultrasound, transcutaneous electrical nerve stimulation (TENS), acupuncture or hydrotherapy.

All participants had received some physiotherapy due in part to the recruitment pathways into the study. Some participants were referred swiftly to a specialist



1 A qualitative study of patients' perceptions and priorities when living with primary frozen shoulder  
2 FINAL MAIN DOCUMENT (article summary, body of text, acknowledgements, references)  
3 BMJ Open

4 physiotherapist, a factor which may have been influenced by the involvement of a  
5 surgery with a physiotherapist specialising in MSK and FS and may not be generally  
6 representative. In other cases participants were referred, only after lengthy periods  
7 of care by an occupational physiotherapist and/or their own GP, to a specialist  
8 physiotherapist, a GP with a special interest in MSK conditions or a consultant  
9 shoulder and elbow surgeon. Two participants received surgical interventions:  
10 manipulation under anaesthetic and an operative capsular release, respectively.

11 MSK specialists, whether specialist physiotherapists, GPs with a special interest or  
12 surgeons, were available in various locations. There were sometimes delays in  
13 referral to these specialists, but once referred, participants reported positively on  
14 their care in each location. Definitive diagnoses were made or confirmed. Referral  
15 also brought an understanding approach, clarity and relief; participants expressed  
16 profound relief at knowing what the problem was and being in the care of someone  
17 who knew about the condition. Some of their worries could be explained and their  
18 questions answered. This was very important to them.

19  
20  
21  
22 “[S/he] went into extreme [detail], were there any questions, [s/he] was so  
23 incredibly thorough, I can't say enough really. [S/he] went into, straight away  
24 what it was, because what I couldn't understand was, why was I getting this  
25 pain in the top of my arm when it is a frozen shoulder, but why am I getting pain  
26 in the arm and not the shoulder?”

27 “What did [s/he] say?”

28 “[S/he] did me a diagram; [s/he] showed me a model of a skeleton.”

29 Participant 10  
30  
31

32 Relationships with specialists were generally reported as friendly and non-  
33 hierarchical, and conducive to the exchange of information. In general, however,  
34 there was over-reliance on verbal information, with very limited use of other media.  
35

## 36 DISCUSSION

### 37 *Principal findings*

38 Patients' initial experience was characterised by severe, inexplicable pain followed  
39 by increasing restriction of movement. Overcoming these symptoms and recovering  
40 functional capacity was their priority. Understanding the cause, seriousness and  
41 likely outcome of the condition were also important to them. Reducing delay in  
42 diagnosis was a common plea with considerable anxiety, confusion and delay for  
43 those in the continued care of non-specialists. This was followed by a sense of relief  
44 on meeting a specialist, with gradual improvement ensuing in most cases. Most  
45 patients found hope and encouragement through this interaction, although elements  
46 of the condition remained inexplicable and uncertain. There was over-reliance on  
47 verbal communication and very little written information was provided.  
48  
49

### 50 *Strengths and weaknesses of the study*

51 A major strength of this study is that to our knowledge, this is the first time the  
52 experiences of patients with this condition have been reported.  
53  
54

55 Patients were recruited from care settings representative of those where the  
56 condition is typically managed. However, this was a small study which  
57 consequentially included data from a limited number of patients from a single  
58  
59  
60

A qualitative study of patients' perceptions and priorities when living with primary frozen shoulder  
FINAL MAIN DOCUMENT (article summary, body of text, acknowledgements, references)  
BMJ Open

geographical area. Although their own stories remain valid they would not necessarily be representative of all patients.<sup>15</sup> In addition two participants' experiences of FS was historical, so that, compared to recent cases, their contributions are likely to be more open to recall bias, and to reflect earlier approaches to care. Nevertheless the design included trustworthy methods such as using a standard protocol to introduce the study to prospective participants, selecting patients at different stages in the disease trajectory, using a topic schedule for interviews and recording interviews for transcription.

#### *Strengths and weaknesses in relation to other studies*

To our knowledge, and despite extensive searching,<sup>4</sup> there is no literature with which to directly compare our results. Our results are not directly comparable to those of Hush et al,<sup>11</sup> who systematically reviewed studies from Canada, UK, USA and Scandinavia and found high levels of patient-satisfaction with MSK physiotherapy. While our study indirectly encompassed patient satisfaction, it differed in its focus, both in terms of being specific to primary FS, and in terms of including experience of the broader care pathway, not physiotherapy alone. Nonetheless, the aspects of care most consistently identified by Hush et al<sup>11</sup> as important to patients were the personal and professional attributes of the clinician, explanation and communication of information, and treatment outcome. These findings are strongly reinforced by our own work. A consistent international observation is the lack of confidence of GPs in diagnosing subtypes of shoulder pain,<sup>16 17</sup> and this may have a critical bearing on the appropriateness and timing of care pathways for patients with shoulder conditions.

#### *Implications for clinicians and policymakers*

A care pathway with prompt diagnosis and access to specialist (or informed) care is required for sufferers of FS. Non-specialist healthcare staff, particularly GPs and physiotherapists, should be made more aware of this condition. This awareness would include diagnostic criteria, expectations, management strategies, and patients' needs for information and reassurance.

It is clear that, in some cases, there is a serious mismatch between clinicians' and patients' perceptions of the impact of FS. Strategies for educating clinicians are required, in order to convey the immense impact that frozen shoulder may have on sufferers' lives. Such education should ensure that active measures, to encourage timely resolution, are always offered.

There is a need to provide standardised, consistent information for patients, designed in collaboration with patients and based on the best available evidence. This information should address patients' questions and concerns, rather than clinicians' perceptions of what patients' questions and concerns should be. The information should be available in multiple formats in order to maximise its accessibility.

The Chartered Society of Physiotherapy's (CSP) clinical guidelines for FS and quick reference summary endeavour to address some of these issues.<sup>8 9</sup> Dissemination is now the key to connecting evidence and target audience. Awareness among other healthcare staff should be raised in order that their interaction with this patient group is apposite.

1 A qualitative study of patients' perceptions and priorities when living with primary frozen shoulder  
2 FINAL MAIN DOCUMENT (article summary, body of text, acknowledgements, references)  
3 BMJ Open

### 4 *Future research*

5 Our participants expressed a clear preference for early specialist referral; also a  
6 need for reassurance and timely, comprehensible advice and information in a variety  
7 of media. The evidence base underpinning the management of FS is not strong<sup>4,8</sup>  
8 and studies into the natural history of FS have produced somewhat contradictory  
9 results<sup>10,18</sup>. A need for more primary research and for research of higher quality on  
10 FS has been identified elsewhere.<sup>4,8</sup> But clinicians could make better use of the  
11 evidence, limited though it is.

12  
13 Until recently, with the advent of initiatives such as INVOLVE,<sup>19</sup> the general clinical  
14 research agenda has often lacked a focus on patients' perspectives. In relation to FS  
15 research specifically, patient involvement has yet to make appreciable inroads, but  
16 this must change if such research is to be relevant. Unless the aspects of FS which  
17 most concern patients are known, generic shoulder pain Patient Reported Outcome  
18 Measures (PROMs)—used to measure condition severity and progress in such  
19 research, as well as in clinical practice—cannot be considered completely valid. Nor  
20 is it possible to develop a more sensitive, condition-specific PROM.<sup>20</sup> The present  
21 study, by exploring which aspects of FS patients most care about, contributes to a  
22 foundation for such validation and development.  
23

### 24 **CONCLUSIONS**

25 Patients' perspectives on the experience of FS and their priorities for treatment have  
26 not previously been explored; however it is clear that this has been a major  
27 omission. Our study identified a number of issues that were important to patients.  
28 These included pain, but recovery from functional disability was often given higher  
29 priority. Anxiety was another key theme, and the struggle of living and dealing with  
30 FS was compounded, in some cases, by a lack of awareness on the part of  
31 healthcare professionals and, foremost, a failure to diagnose the condition.  
32  
33

34  
35 To address these issues most effectively it is recommended that a diagnosis, even if  
36 only tentative, be quickly established for more patients. This would require GPs to  
37 recognise the salient diagnostic features. They and other healthcare workers should  
38 also be educated on the condition's impact on individuals, and accordingly the  
39 findings of the present study should be disseminated and built upon. Advice and  
40 information in various formats, reflecting the best available evidence, should be  
41 made readily available to patients. Finally, the evidence base for effectiveness of  
42 treatments needs to be expanded, maximally utilising patient participation. The  
43 present study, by exploring which aspects of FS patients most care about,  
44 contributes to this goal.  
45  
46

47 **Funding:** Funded by Teesside University's research fund.

48  
49 **Competing interests:** Dr. Hanchard, Dr. Hamilton and Susan Jones have nothing to  
50 disclose. Dr. Rangan reports grants and personal fees from DePuy Ltd, personal  
51 fees from JRI Ltd, outside the submitted work. In addition, Dr. Rangan has a patent  
52 UK & European pending. (Statement generated by their system when completed  
53 conflict of interest forms).  
54  
55

56 **Author's contribution:** AR initiated the concept and design, revised the draft and  
57 approved the final article; NH developed the idea for the study with SH and advised  
58  
59  
60

A qualitative study of patients' perceptions and priorities when living with primary frozen shoulder  
FINAL MAIN DOCUMENT (article summary, body of text, acknowledgements, references)  
BMJ Open

on musculoskeletal and physiotherapy aspects. NH wrote the background section of the article and contributed to the drafting and editing of the whole. SJ conducted the interviews, transcribed and analysed them, wrote up the findings and drafted the body of the article. SH supported SJ, reviewed the analysis, assisted in writing up the findings and contributed to developing and writing the article.

**Acknowledgements:** Chris Richardson, Heidi Clark, Lorna Goodchild, Jim Robertson, Birgit Hanusch and Lucksy Kottam also contributed by identifying the design, aiding in recruitment and/or commenting on the draft article.

**Provenance and peer review:** Not commissioned; externally peer reviewed.

**Ethics approval:** Approval was received from the School of Health Research Governance & Ethics Committee at Teesside University and South Tees Hospitals NHS Foundation Trust Research and Governance Department.

**Data sharing statement:** Quotes and further details are available from Susan Jones at [Susan.Jones@tees.ac.uk](mailto:Susan.Jones@tees.ac.uk)

## References

1. Hand GCR, Athanasou NA, Matthews T, Carr AJ. The pathology of frozen shoulder. *J Bone Joint Surg Br.* 2007;89(7):928–32.
2. Kelley MJ, McClure PW, Leggin BG. Frozen shoulder: evidence and a proposed model guiding rehabilitation. *J Orthop Sport Phys.* 2009;39(2):135–48.
3. Milgrom C, Novack V, Weil Y, et al. Risk factors for idiopathic frozen shoulder. *Isr Med Assoc J: IMAJ.* 2008;10(5):361–4.
4. Maund E, Craig D, Suekarran S, et al. Management of frozen shoulder: a systematic review and cost-effectiveness analysis. *Health Technol Asses (Winchester, England).* 2012;16(11):1–243.
5. Walker-Bone K, Palmer KT, Reading I, Coggon D, Cooper C. Prevalence and impact of musculoskeletal disorders of the upper limb in the general population. *Arthritis Rheum.* 2004;51(4):642–51.
6. Boyle-Walker KL, Gabard DL, Bietsch E, Masek-VanArsdale DM, Robinson BL. A profile of patients with adhesive capsulitis. *J Hand Ther.* 1997;10:222–228.
7. Codman EA. *Rupture of the supraspinatus tendon and other lesions in or about the subacromial bursa.* Boston: Privately published; 1934.
8. Hanchard N, Goodchild L, Thompson J, et al. *Evidence-based clinical guidelines for the diagnosis, assessment and physiotherapy management of contracted (frozen) shoulder. Version 1.7: "standard" physiotherapy. Endorsed by the Chartered Society of Physiotherapy.* 2011:157p. Available at: [www.csp.org.uk/skippp](http://www.csp.org.uk/skippp).

1 A qualitative study of patients' perceptions and priorities when living with primary frozen shoulder  
2 FINAL MAIN DOCUMENT (article summary, body of text, acknowledgements, references)  
3 BMJ Open

- 4 9. Hanchard NCA, Goodchild L, Thompson J, et al. Evidence-based clinical  
5 guidelines for the diagnosis, assessment and physiotherapy management of  
6 contracted (frozen) shoulder: quick reference summary. *Physiotherapy*.  
7 2012;98(2):117–20. Available at: <http://dx.doi.org/10.1016/j.physio.2012.01.001>  
8 [Accessed June 6, 2013]
- 9  
10 10. Hand C, Clipsham K, Rees JL, Carr AJ. Long-term outcome of frozen shoulder. *J*  
11 *Shoulder Elb Surg*. 2008;17(2):231–6.
- 12  
13 11. Hush JM, Cameron K, Mackey M. Patient satisfaction with musculoskeletal  
14 physical therapy care: a systematic review. *Phys Ther*. 2011;91(1):25-36.
- 15  
16 12. Rookmoneea M, Dennis L, Brealey S, et al. The effectiveness of interventions in  
17 the management of patients with primary frozen shoulder. *J Bone Joint Surg Br*.  
18 2010;92(9):1267–72.
- 19  
20 13. Jack B. Giving them a voice: the value of qualitative research. *Nurse*  
21 *Researcher*. 2010; 17(3):4-6.
- 22  
23 14. Braun V, Clarke V. Using thematic analysis in psychology. *Qual Res Psychol*.  
24 2006;3(2):77–101.
- 25  
26 15. Depoy E, Gitlin LN. *Introduction to Research: Understanding and Applying*  
27 *Multiple Strategies*. 4th ed. St Louis: Elsevier Mosby; 2005:368.
- 28  
29 16. Linsell L, Dawson J, Zondervan K, et al. Prevalence and incidence of adults  
30 consulting for shoulder conditions in UK primary care; patterns of diagnosis and  
31 referral. *Rheumatology (Oxford, England)*. 2006;45(2):215–221.
- 32  
33 17. Wofford JL, Mansfield RJ, Watkins RS. Patient characteristics and clinical  
34 management of patients with shoulder pain in U.S. primary care settings: secondary  
35 data analysis of the National Ambulatory Medical Care Survey. *BMC Musculoskel*  
36 *Dis*. 2005;6:4. Available at:  
37 [http://www.pubmedcentral.nih.gov/articlerender.fcgi?artid=549528&tool=pmcentrez&](http://www.pubmedcentral.nih.gov/articlerender.fcgi?artid=549528&tool=pmcentrez&rendertype=abstract)  
38 [rendertype=abstract](http://www.pubmedcentral.nih.gov/articlerender.fcgi?artid=549528&tool=pmcentrez&rendertype=abstract) [Accessed September 12, 2010].
- 39  
40 18. Binder AI, Bulgen DY, Hazleman BL, Roberts S. Frozen shoulder: a long-term  
41 prospective study. *Ann Rheum Dis*. 1984;43(3):361–4.
- 42  
43 19. UKCRC. PPI Strategic Plan. 2011. Available at:  
44 <http://www.ukcrc.org/patientsandpublic/ppi/ppistratplan/> [Accessed October 12,  
45 2012].
- 46  
47 20. Department of Health. Guidance on the routine collection of Patient Reported  
48 Outcome Measures (PROMs). *Department of Health*. 2008.
- 49  
50  
51  
52  
53  
54  
55  
56  
57  
58  
59  
60

Figure 1: Thematic map

1  
2  
3  
4  
5  
6  
7  
8  
9  
10  
11  
12  
13  
14  
15  
16  
17  
18  
19  
20  
21  
22  
23  
24  
25  
26  
27  
28  
29  
30  
31  
32  
33  
34  
35  
36  
37  
38  
39  
40  
41  
42  
43

# PAIN

Extreme, nauseating,  
intense

# INCONVENIENCE

Limiting, long lasting  
Active people disabled

# CONFUSION

What is causing  
this?

Delay going to GP or occupational health –  
pain becomes so severe eventually seek help

TREATMENT BY GP

REFERRED TO A SPECIALIST

Confusion continues  
Diagnosis uncertain

Patient priorities identified  
as:

- Regaining function
- Earlier diagnosis
- Raising awareness  
amongst health care staff
- More information

Relief

Clarity

Questions  
answered

Gradual  
improvement of  
symptoms

Hope for  
the future

A qualitative study of patients' perceptions and priorities when living with primary frozen shoulder

RESEARCH CHECKLIST FINAL for article for BMJ Open

Research checklist – COREQ (taken from Tong et al 2007)

No Item Guide questions/description

**Domain 1: Research team and reflexivity**

*Personal Characteristics*

- |                            |                                                                               |
|----------------------------|-------------------------------------------------------------------------------|
| 1. Interviewer/facilitator | Which author/s conducted the interview or focus group? <b>SJ</b>              |
| 2. Credentials             | What were the researcher's credentials? E.g. PhD, MD <b>MSc</b>               |
| 3. Occupation              | What was their occupation at the time of the study? <b>Research associate</b> |
| 4. Gender                  | Was the researcher male or female? <b>F</b>                                   |
| 5. Experience and training | What experience or training did the researcher have?                          |

**Research methods to master's degree level; 5 years' experience of working with qualitative research methods**

*Relationship with participants*

- |                             |                                                             |
|-----------------------------|-------------------------------------------------------------|
| 6. Relationship established | Was a relationship established prior to study commencement? |
|-----------------------------|-------------------------------------------------------------|

**No**

- |                                             |  |
|---------------------------------------------|--|
| 7. Participant knowledge of the Interviewer |  |
|---------------------------------------------|--|

What did the participants know about the researcher? e.g. personal goals, reasons for doing the research

**Study explained initially by physiotherapist treating their condition; no specific information about interviewer given; invitation and participant information sheet given before interview day with the following information:**

**We are researchers from Teesside University who are working with doctors and physiotherapists in the community and at James Cook University Hospital. We want to find out your views of living with frozen shoulder and so we would like to invite you to take part in this study.**

**What is the study for?**

**This study will help us to find out what is important to people suffering from frozen shoulder. What is found out will be used to design a larger study about treatment of this condition. This second study will give us more information about treatments that are available.**

**Why have I been asked to take part?**

**Health care staff will have given this information to you for us. We would like to find out the experiences and views of patients who are suffering from frozen shoulder.**

**This will help us to get a better understanding of what is important to you and how to improve our healthcare services.**

- |                                |                                                                                                                                           |
|--------------------------------|-------------------------------------------------------------------------------------------------------------------------------------------|
| 8. Interviewer characteristics | What characteristics were reported about the interviewer/facilitator? e.g. Bias, assumptions, reasons and interests in the research topic |
|--------------------------------|-------------------------------------------------------------------------------------------------------------------------------------------|

**The text states: "Interviews, transcription and subsequent data checking were undertaken by researchers with a nursing background and experience in qualitative**

A qualitative study of patients' perceptions and priorities when living with primary frozen shoulder

RESEARCH CHECKLIST FINAL for article for BMJ Open

research (SJ, SH). These researchers were ideally placed, firstly because their core professional role is not directly involved in FS management (this facilitated objectivity); and secondly because their clinical backgrounds gave them insights into the nuances of patient-healthcare provider relationships."

## Domain 2: study design

### *Theoretical framework*

#### 9. Methodological orientation and Theory

What methodological orientation was stated to underpin the study? e.g. grounded theory, discourse analysis, ethnography, phenomenology, content analysis

The text states: "An inductive approach to analysis was taken, using a constant comparative method." "The data were independently analysed by two researchers using the six stage thematic approach outlined by Braun and Clarke." "Data were analysed after each interview and the findings informed the questions and topics for subsequent interviews."

### *Participant selection*

#### 10. Sampling

How were participants selected? e.g. purposive, convenience, consecutive, snowball **Purposive**

#### 11. Method of approach

How were participants approached? e.g. face-to-face, telephone, mail, email

**Face-to-face using agreed standard protocol then telephone, email and/or letter from researcher as requested by potential participant.**

#### 12. Sample size

How many participants were in the study? **12**

#### 13. Non-participation

How many people refused to participate or dropped out? Reasons? **1, did not agree to interview**

### *Setting*

#### 14. Setting of data collection

Where was the data collected? e.g. home, clinic, workplace

The text states: "Interviews took place on NHS or University premises or by telephone."

#### 15. Presence of non-participants

Was anyone else present besides the participants and researchers? **No**

#### 16. Description of sample

What are the important characteristics of the sample? e.g. demographic data, date **Gender, age, history of condition,**

### **dates of data collection**

#### *Data collection*

#### 17. Interview guide

Were questions, prompts, guides provided by the authors?

Was it pilot tested? **Text states: "using a topic schedule for**

**Interviews"** "Questions related to the particular phase currently experienced by participants but also included questions about the previous phase, where applicable. The interviews mainly comprised open questions to encourage the participants to tell their stories." **It was not pilot tested.**

#### 18. Repeat interviews

Were repeat interviews carried out? **No** If yes, how many?

#### 19. Audio/visual recording

Did the research use audio or visual recording to collect the data? **Audio recording of interviews**

#### 20. Field notes

Were field notes made during and/or after the interview or focus group? **Yes**

#### 21. Duration

What was the duration of the interviews or focus group? **30-45**

#### **minutes**

#### 22. Data saturation

Was data saturation discussed? **Yes**



A qualitative study of patients' perceptions and priorities when living with primary frozen shoulder

RESEARCH CHECKLIST FINAL for article for BMJ Open

23. Transcripts returned      Were transcripts returned to participants for comment and/or correction? **No**

### Domain 3: analysis and findings

#### *Data analysis*

24. Number of data coders      How many data coders coded the data? **1 principal coder; 1 independent checker**

25. Description of the coding tree

Did authors provide a description of the coding tree? **No**

26. Derivation of themes      Were themes identified in advance or derived from the data?

**Inductive approach, derived from the data**

27. Software      What software, if applicable, was used to manage the data?

**Nvivo 9**

28. Participant checking      Did participants provide feedback on the findings? **No**

#### *Reporting*

29. Quotations presented      Were participant quotations presented to illustrate the themes / findings? Was each quotation identified? e.g. participant number **Yes**

30. Data and findings consistent

Was there consistency between the data presented and the findings? **Yes**

31. Clarity of major themes      Were major themes clearly presented in the findings? **Yes**

32. Clarity of minor themes      Is there a description of diverse cases or discussion of minor themes? **Historical aspect, bilateral cases**

### REFERENCE

Tong A, Sainsbury P, Craig J. Consolidated criteria for reporting qualitative research (COREQ): a 32-item checklist for interviews and focus groups. *International Journal for Quality in Health Care*. 2007;19(6):349–357.



**A qualitative study of patients' perceptions and priorities  
when living with primary frozen shoulder**

|                                    |                                                                                                                                                                                                                                                                                            |
|------------------------------------|--------------------------------------------------------------------------------------------------------------------------------------------------------------------------------------------------------------------------------------------------------------------------------------------|
| Journal:                           | <i>BMJ Open</i>                                                                                                                                                                                                                                                                            |
| Manuscript ID:                     | bmjopen-2013-003452.R1                                                                                                                                                                                                                                                                     |
| Article Type:                      | Research                                                                                                                                                                                                                                                                                   |
| Date Submitted by the Author:      | 16-Aug-2013                                                                                                                                                                                                                                                                                |
| Complete List of Authors:          | Jones, Susan; Teesside University, Health and Social Care Institute<br>Hanchard, Nigel; Teesside University, Health and Social Care Institute<br>Hamilton, Sharon; Teesside University, Health and Social Care Institute<br>Rangan, Amar; The James Cook University Hospital, Orthopaedics |
| <b>Primary Subject<br>Heading</b>: | Qualitative research                                                                                                                                                                                                                                                                       |
| Secondary Subject Heading:         | Patient-centred medicine                                                                                                                                                                                                                                                                   |
| Keywords:                          | Shoulder < ORTHOPAEDIC & TRAUMA SURGERY, Musculoskeletal disorders<br>< ORTHOPAEDIC & TRAUMA SURGERY, PAIN MANAGEMENT                                                                                                                                                                      |
|                                    |                                                                                                                                                                                                                                                                                            |

SCHOLARONE™  
Manuscripts

Peer review only

A qualitative study of patients' perceptions and priorities when living with primary frozen shoulder  
MAIN DOCUMENT (article summary, body of text, references, editable tables)  
BMJ Open amended and resubmitted following peer review – 16/8/13

## A qualitative study of patients' perceptions and priorities when living with primary frozen shoulder

Jones, Susan<sup>1</sup>; Hanchard, Nigel<sup>1</sup>; Hamilton, Sharon<sup>1</sup>; Rangan, Amar<sup>2</sup>

<sup>1</sup>Teesside University – Health and Social Care Institute, Middlesbrough, United Kingdom

<sup>2</sup>The James Cook University Hospital – Orthopaedics, Middlesbrough, United Kingdom

Corresponding author:

**Susan E. Jones**

Health and Social Care Institute

Teesside University

Parkside West Offices

Borough Road

Middlesbrough

TS1 3BA

United Kingdom

Phone: 01642342984

Email: [Susan.Kones@tees.ac.uk](mailto:Susan.Kones@tees.ac.uk)

1 A qualitative study of patients' perceptions and priorities when living with primary frozen shoulder  
2 MAIN DOCUMENT (article summary, body of text, references, editable tables)  
3 BMJ Open amended and resubmitted following peer review – 16/8/13

### 4 **Abstract**

5 Objectives: To elucidate the experiences and perceptions of people living with primary  
6 frozen shoulder, and their priorities for treatment.

7  
8 Design: Qualitative study design using semi-structured interviews.

9  
10 Setting: GP and musculoskeletal (MSK) clinics in primary and secondary care in one NHS  
11 Trust in England.

12  
13 Participants: Twelve patients diagnosed with primary frozen shoulder were purposively  
14 recruited from a GP surgery, community clinics and hospital clinics. Recruitment targeted the  
15 phases of frozen shoulder: pain predominant (n=5), stiffness predominant (n=4), and  
16 residual stiffness predominant following hospital treatment (n=2). One participant dropped  
17 out. Inclusion criteria: Adult, male and female patients of any age, attending the clinics, who  
18 had been diagnosed with primary frozen shoulder.

19  
20  
21 Results: The most important experiential themes identified by participants were: pain which  
22 was both severe and inexplicable; inconvenience/disability arising from increasing restriction  
23 of movement (due to pain initially, gradually giving way to stiffness); confusion/anxiety  
24 associated with delay in diagnosis and uncertainty about the implications for the future; and  
25 treatment-related aspects. Participants not directly referred to a specialist (whether  
26 physiotherapist, physician or surgeon) wanted a faster, better-defined care pathway.  
27 Specialist consultation brought more definitive diagnosis, relief from anxiety, and usually  
28 self-rated improvement. The main treatment priority was improved function, though there  
29 was recognition that this might be facilitated by relief of pain or stiffness. There was a  
30 general lack of information from clinicians about the condition with over-reliance on verbal  
31 communication and very little written information.

32  
33  
34 Conclusions: Awareness of frozen shoulder should be increased among non-specialists and  
35 the best available information made accessible for patients. Our results also highlight the  
36 importance of patient participation in frozen shoulder research.

### 37 **Article Summary**

#### 38 *Article focus*

- 39 • The experiences and perceptions of people living with primary frozen  
40 shoulder, and their priorities for treatment.

#### 41 *Key messages*

- 42 • Primary frozen shoulder causes severe pain and restricts activities of daily  
43 living. Incorrect or delayed diagnoses often amplify patient anxiety and hold  
44 up treatment.
- 45 • Care pathways are needed with prompt diagnosis and access to specialist (or  
46 informed) care. Raising awareness of the diagnostic criteria and management  
47 options among non-specialist healthcare staff—especially GPs and  
48 physiotherapists—should make this more achievable.

A qualitative study of patients' perceptions and priorities when living with primary frozen shoulder  
MAIN DOCUMENT (article summary, body of text, references, editable tables)  
BMJ Open amended and resubmitted following peer review – 16/8/13

- Translation of evidence to the target audience of non-specialist healthcare professionals is a priority.

#### *Strengths and limitations of this study*

This study is the first to focus on patients' experiences of conventional care pathways for frozen shoulder, and their priorities for treatment.

Patients were recruited from care settings where the condition is typically managed. The number of participants was small, so the findings must be considered indicative rather than conclusive, but enough repetition took place to be confident in the themes identified. In addition, two participants' experience of frozen shoulder was retrospective. Compared to recent cases, their contributions are likely to be more open to error of memory, and to reflect less current approaches to care.

Nevertheless the design included trustworthy methods with clear reporting, allowing readers to make their own judgement on trustworthiness. As the work published on this topic is very limited this article makes a valuable contribution.

## **INTRODUCTION**

Frozen shoulder (FS) is a condition affecting the capsule of the shoulder joint, and is characterised by inflammation and contracture.<sup>1</sup> These events may occur for no identifiable reason in "primary" or "idiopathic" FS. "Secondary" FS is associated with some other event or condition: the most common associated event is trauma,<sup>2</sup> whereas associated conditions include rotator cuff disease, hemiparesis and others.<sup>3</sup> Diabetes is a known risk factor for FS.<sup>4</sup> Some authorities consider FS associated with diabetes to be a "primary" type, and others consider it "secondary".<sup>5</sup>

FS affects around 10% of the general adult population,<sup>6</sup> men and women approximately equally,<sup>6,7</sup> and the prevalence of those seeking help is 2 to 5%.<sup>8</sup> To our knowledge, there are no published data on the relative prevalence of primary and secondary FS. However, FS of no detectable cause is thought to predominate, with patients whose FS is associated with diabetes constituting an additional "substantial" group,<sup>3</sup> accounting for almost one-third of all FS.<sup>7</sup>

The healthcare implications of FS are considerable. In the UK, for example, based on a single GP consultation for each case, it costs the National Health Service at least £44.1 million (assuming a prevalence of 2%) or £110.3 million (assuming a prevalence of 5%). And since the usual age at onset is 40-60 years,<sup>9</sup> which is typically within the working-age range, there is a crucial economic impact on individuals and society.

Codman, who coined the term frozen shoulder, described the typical clinical manifestation as early as 1934:

"The condition [comes] on slowly; pain usually felt near the insertion of the deltoid; inability to sleep on the affected side; painful and incomplete elevation and external rotation; restriction of both spasmodic and mildly adherent type; atrophy of the spinati; little local tenderness; X-rays negative except for bone atrophy."<sup>10</sup>

1 A qualitative study of patients' perceptions and priorities when living with primary frozen shoulder  
2 MAIN DOCUMENT (article summary, body of text, references, editable tables)  
3 BMJ Open amended and resubmitted following peer review – 16/8/13

4 However, the location of pain may be variable<sup>9</sup> and diagnosis may present a  
5 challenge, particularly for the non-specialist, and particularly in the early stages,  
6 when the signs are not pronounced: not least because false positive responses to  
7 standard tests for shoulder impingement (Neer's sign, Hawkins' test) are to be  
8 expected.<sup>11</sup>

9  
10 Recognising FS as phasic in nature, the recent UK guidelines for diagnosis,  
11 assessment and physiotherapy management of FS recommend a simple  
12 dichotomous "pain predominant" or "stiffness predominant" classification, whereby  
13 the patient is the arbiter of the stage, and pain takes precedence when there is  
14 ambiguity.<sup>11</sup> Potential interventions include watchful waiting, physiotherapy, steroid  
15 injection, distension arthrography, manipulation under anaesthetic (MUA) and  
16 arthroscopic capsular release.<sup>5 11</sup> There is some evidence for specific interventions,  
17 although none of this is strong,<sup>6 12</sup> and not all observational series have verified the  
18 certainty of complete recovery. For example, in a recent study of 223 patients with  
19 FS referred to tertiary care, 38% had persistent mild symptoms, mostly pain, at a  
20 mean follow-up of 4.4 years (range 2 to 20 years). In 3% the persistent symptoms  
21 were severe, with pain and functional deficits.<sup>13</sup>

22  
23  
24 Despite a general appreciation that the condition imposes a serious burden on  
25 sufferers, the research literature demonstrates a lack of interest in the subjective  
26 experience of FS and patients' priorities for treatment. A recent systematic review  
27 commissioned by the UK Department of Health sought studies on patients' views of  
28 conventional treatments, but found none.<sup>5</sup> A similar search without restriction on  
29 treatment type revealed just one study, focused on Bowen therapy and providing  
30 only limited insights.<sup>14</sup> This paucity is surprising, as there is evidence to show that  
31 patients' attitude towards treatment significantly affects concordance, including in  
32 musculoskeletal (MSK) conditions.<sup>15</sup> Therefore it is important to consider the patient  
33 perspective when assessing overall treatment effectiveness.<sup>15</sup> This has become  
34 increasingly relevant with the move towards a patient-centred paradigm of  
35 healthcare.<sup>15</sup> This paper seeks to qualitatively explore the experiences and  
36 perceptions of people living with primary frozen shoulder, and their priorities for  
37 treatment.  
38  
39  
40  
41

## 42 **METHODS**

43 A qualitative study design employing semi-structured interviews was used to explore  
44 the experiences, priorities and perceptions of those experiencing the different  
45 phases of primary FS. Primary FS was chosen as the inclusion of secondary FS  
46 might have resulted in excessive heterogeneity.  
47

### 48 **Participants**

#### 49 ***Inclusion criteria***

50 Adult, male and female patients of any age, with or without diabetes, who had been  
51 diagnosed with primary FS by the following criteria:

- 52 • shoulder pain for at least one month;
  - 53 • reduction in passive external rotation of 50% or more compared to the  
54 contralateral side<sup>16</sup> with a clinically significant change in end-feel;
  - 55 • no clinical suspicion of other pathologies that might present similarly; and
  - 56 • normal X-rays (only if clinically indicated).
- 57  
58  
59  
60

A qualitative study of patients' perceptions and priorities when living with primary frozen shoulder  
MAIN DOCUMENT (article summary, body of text, references, editable tables)  
BMJ Open amended and resubmitted following peer review – 16/8/13

## Recruitment

Recruitment occurred in community and hospital settings. Clinical members of the research team who recruited participants from the community worked in a general medical practice; however in addition to their own surgery clinics they also recruited from clinics that they ran in collaboration with other specialist doctors and physiotherapists, which were spread across the community. The patients recruited from the MSK and hospital-based clinics had been referred to specialist services.

## Sampling

A structured, purposive sample of patients in the different phases of FS,<sup>17</sup> as defined by the UK guidelines,<sup>11</sup> with a story to tell,<sup>18</sup> was selected by the clinicians. Group 1 comprised patients in the pain predominant phase and was drawn exclusively from community care; group 2 were in the stiffness predominant phase, drawn from both community and secondary care (i.e. the hospital setting); and group 3 were in the residual stiffness predominant phase following hospital treatment, and drawn exclusively from secondary care. Clinicians were given a standard protocol to use, which provided basic details of the study and what would be required of participants. Patients were given an introductory pack which included an information sheet and contact details, requesting that they respond directly to the research team. When a potential participant contacted the team they were given the opportunity to ask any questions prior to arranging an interview. Twenty-two packs were handed out and twelve patients responded; none were excluded. The demographic characteristics of the sample were consistent with the FS population across the UK at large.<sup>6,7</sup>

## Data collection

Interviews took place on NHS or University premises or by telephone. Each commenced by establishing informed consent. Interviewees were then allowed the opportunity to give detailed descriptions of their experiences, with individual interviews lasting approximately 30-45 minutes. Schedules comprising the topics to be covered and a range of prompts relating to specific issues of interest were used to guide data collection during interviews. Questions related to the particular phase currently experienced by participants but also included questions about the previous phase, where applicable. The interviews mainly comprised open questions to encourage the participants to tell their stories. Field notes were made of observations to supplement the transcripts. Credibility was demonstrated by confirmation of information from multiple participants leading to identification of common themes. Interviews were audio recorded with the permission of participants and later transcribed. Interviews, transcription and subsequent data checking were undertaken by healthcare researchers experienced in qualitative research (SJ, SH).

## Data analysis

An inductive approach to analysis was taken, using a constant comparative method. Data were analysed after each interview and the findings informed the questions and topics for subsequent interviews. The data were independently analysed by two researchers using the six stage thematic approach outlined by Braun and Clarke.<sup>19</sup> An in-depth familiarisation with the data was followed by the generation of initial codes, using Nvivo 9, which were then applied to the data and collated into potential themes independently by the researchers. These themes were then reviewed,

1 A qualitative study of patients' perceptions and priorities when living with primary frozen shoulder  
2 MAIN DOCUMENT (article summary, body of text, references, editable tables)  
3 BMJ Open amended and resubmitted following peer review – 16/8/13  
4 generating a thematic map of the analysis. In the next stage the themes were refined  
5 and named. Finally, examples were selected to illustrate the thematic framework.

## 6 **RESULTS**

### 7 **Participants**

8 Data collection occurred between July 2011 and November 2011. Twelve  
9 participants were recruited, and eleven agreed to be interviewed. Five met the  
10 criteria for group 1, four for group 2 and two for group 3 (see Table 1). They included  
11 six women and five men, aged from 40 years upwards, predominantly in their fifties  
12 (n=7). Three of the men had diabetes and formed the younger end of the group, with  
13 two in their forties and one in his early fifties. Three participants had experienced FS  
14 in both shoulders (though none on both sides concurrently). One participant may  
15 have experienced FS in both shoulders, but could not remember the diagnosis given  
16 for the first-affected shoulder. One participant, with a previous history of  
17 impingement (not FS) in the contralateral shoulder, was initially given the same  
18 diagnosis on the currently affected side, but was subsequently diagnosed with FS.  
19 Two of the participants had suffered with FS several years ago and were recruited as  
20 their history was known to the physiotherapist.

### 23 **Contexts of participant journeys**

24 One participant consulted a GP one week after the start of symptoms but all the  
25 others waited six to eight weeks before presenting for a consultation. After initial  
26 presentation they followed various paths towards specialist treatment. Some  
27 participants experienced delay in receiving a definitive diagnosis and specialist (i.e.  
28 MSK or shoulder specialist) care (see Table 1).

### 31 **Thematic analysis**

32 Four major patient-reported themes associated with FS were identified and are  
33 shown in the thematic map (Figure 1).

### 36 **Figure 1:** 37 **THEMATIC MAP - HERE**

#### 39 **Theme 1: Pain**

40 Patients reported that the pain would start quite suddenly and gradually worsen over  
41 weeks and months. During the initial (pain predominant) phase the pain would be  
42 very intense on certain movements, typically stretching or reaching in specific  
43 directions. Unguarded movement, in particular, caused severe pain. Also, sleep was  
44 badly disturbed. Once awake, participants struggled to get back to sleep due to  
45 constant, "nagging" pain. Sleep deprivation wore participants down, even though  
46 they reported taking a resilient approach. In an attempt to manage their pain,  
47 participants tried to avoid painful movements, applied ointments and took  
48 medication. The nature of the pain was such that they worried about what could be  
49 the cause.

52  
53 "The amount of pain that I was in, I didn't believe that it was just a frozen  
54 shoulder." Participant 12

56 Finding a way to deal with the pain and carry on with life as normally as possible was  
57 very important to participants.



A qualitative study of patients' perceptions and priorities when living with primary frozen shoulder  
MAIN DOCUMENT (article summary, body of text, references, editable tables)  
BMJ Open amended and resubmitted following peer review – 16/8/13

### **Theme 2: Awareness and expectations**

Participants did not successfully self-diagnose their problem. Typically they thought they had 'pulled something', anticipating that it would resolve in a week or two. Diagnosis also presented a challenge amongst non-specialist healthcare staff.

"I made an appointment at the doctors and the doctor, having examined me, said, 'you are lucky it isn't a frozen shoulder, I think that what you have done is you have trapped a nerve, you have some slight nerve damage, you just need to rest, it will take a couple of months.'" Participant 5

Lack of diagnosis or misdiagnosis led to diverse consequences among the participants e.g. anxiety; denial; and delays in definitive diagnosis and referral. Participants were often left with unanswered questions, uncertainty as to the treatment options and the potential risks and benefits of treatment and, occasionally, with contradictory advice.

"... you want to know where the final outcome is going to be rather than you suffering week in week out thinking, 'when is it going to end? Fed up with this.' Whereas when you know it is going to last 3 or 4 years down the line, I know it is not going to be forever. Whereas you don't know anything; God, is this ever going to go away? I think I would like to know from the start." Participant 11

"I don't know whether I wasn't saying the right things to [my GP] or what .... I don't know whether it is my relationship with the doctor or what, but I don't ... I'm not very good, if they are vague and I don't understand what they are talking about, I won't sit there any longer, I'll, I'll leave. All I wanted was an answer." Participant 12

Participants who did not receive early informed or specialist care would have preferred a quick, clear pathway; and although they understood the difficulty of diagnosis, some expressed disappointment that they had suffered, for what seemed to them, longer than necessary, due to a lack of awareness of the condition on the part of their healthcare providers

"With the shoulder, I was saying, 'it's still hurting' and they [the GPs] were saying 'we'll look to see what else it is then.' Every time, something came back as, 'no, it's negative. Have you got any neck problem, shoulder problem, anything like that?' No arthritis, no swelling in it ... but every time it come back no, you are thinking, now what?" Participant 7 [first-affected shoulder, 2004]

### **Theme 3: Inconvenience/disability**

Typically the FS lasted from one to three years. In a group of people who were usually active, this was hugely disruptive. The inability to use the arm normally, initially due to pain, gradually giving way to stiffness, affected even very fundamental activities of daily living (ADL), including, among others, hair washing and styling, getting out of a bath, dressing, reaching into a back pocket, opening a door, pegging washing out, washing up and other housework, home maintenance jobs, lifting a kettle, cutting up food, pulling a suitcase or wheeled shopping basket, gardening

1 A qualitative study of patients' perceptions and priorities when living with primary frozen shoulder  
2 MAIN DOCUMENT (article summary, body of text, references, editable tables)  
3 BMJ Open amended and resubmitted following peer review – 16/8/13

4 and, when driving, changing gear or positioning for reversing. In order to continue to  
5 drive, one participant had to buy a car with automatic transmission.

6 “Try getting out the bath 'cause you can't find a way up. You just cannot find a  
7 way to get out the bath! We've got bars on the side of the bath anyway but I  
8 couldn't find a way. I just had to snake over the side sometimes.” Participant 7  
9

10 Participants who worked had to change their work routines to accommodate their  
11 limitations; one, for whom this was not possible, had to resign  
12

13 A general observation was that the pain and these major impairments in ADL  
14 occurred without obvious outward signs, so that much of the suffering involved was  
15 hidden from the casual observer. This led to much less sympathy than would be the  
16 case with many conditions.  
17

18  
19 “I was still doing the workload as such, so you don't get any, it's awful to say,  
20 you don't get any sympathy from people because it is not something that stops  
21 you doing things but in yourself you feel so frustrated, because when I reached  
22 up to do anything, we do a lot of overhead stuff, there was no strength in the  
23 arm, it was very painful but nobody would say, “How is it?” You felt that they  
24 didn't understand, because you are at work with it and that was the hardest  
25 thing, and they still expected you to do things because you didn't have your  
26 arm strapped up.” Participant 10  
27  
28

29 A further cause of hidden suffering was that other people relied on their own  
30 experiences of pain when trying to understand the participants' perspective but it  
31 was outside their lexicon of knowledge. Three participants recognised that they  
32 themselves had not understood what it was like or been sufficiently sympathetic  
33 towards others with FS until they acquired it themselves.  
34

35  
36 “I've heard of other people with frozen shoulders and I'm afraid I haven't given  
37 them much sympathy because I didn't know what it involved. You would be in  
38 the same boat. I sympathised, say that's terrible, but really unless you have or  
39 have had a frozen shoulder you don't know how painful it is. It is really  
40 excruciating.” Participant 8  
41  
42

43 In general, so long as the FS was seen as temporary and benign, and they could  
44 care for themselves and keep their jobs until they recovered, participants  
45 accepted their situation; at the same time, they hoped for the earliest possible  
46 resolution.  
47

#### 48 **Theme 4: Treatment**

49 Participants identified functional outcomes e.g. freedom of movement as their main  
50 priority from treatment; however they recognised that if the pain or stiffness remained  
51 they would be unable to recover the movement. On presentation at the GP's surgery,  
52 reflecting the lack of a definitive diagnosis in most cases, there was no standard  
53 course of treatment offered. Two participants came via their occupational health  
54 physiotherapy services then to their GPs. Neither of them received a diagnosis of FS  
55 either. Some GPs opted to wait and see and most prescribed analgesics. As time  
56 passed some offered further investigations and/or administered further first-line  
57  
58  
59  
60

A qualitative study of patients' perceptions and priorities when living with primary frozen shoulder  
MAIN DOCUMENT (article summary, body of text, references, editable tables)  
BMJ Open amended and resubmitted following peer review – 16/8/13

treatment themselves, while others referred patients to an on-site physiotherapist, or to a primary or secondary care MSK clinic.

The range of first-line treatments experienced by the participants from their GPs included ointment, medications and local injections. On referral to the physiotherapist, treatment might include advice and education, hands-on passive mobilisation, exercises, local injections, heat, massage, ultrasound, transcutaneous electrical nerve stimulation (TENS), acupuncture or hydrotherapy.

All participants had received some physiotherapy due in part to the recruitment pathways into the study. Some participants were referred swiftly to a specialist physiotherapist, a factor which may have been influenced by the involvement of a surgery with a physiotherapist specialising in MSK and FS. In other cases participants were referred, only after lengthy periods of care by an occupational physiotherapist and/or their own GP, to a specialist physiotherapist, a GP with a special interest in MSK conditions or a consultant shoulder and elbow surgeon. Two participants received surgical interventions: manipulation under anaesthetic and an operative capsular release, respectively.

MSK specialists, whether specialist physiotherapists, GPs with a special interest or surgeons, were available in various locations. There were sometimes delays in referral to these specialists, but once referred, participants reported positively on their care in each location. Definitive diagnoses were made or confirmed. Referral also brought an understanding approach, clarity and relief; participants expressed profound relief at knowing what the problem was and being in the care of someone who knew about the condition. Some of their worries could be explained and their questions answered. This was very important to them.

“[S/he] went into extreme [detail], were there any questions, [s/he] was so incredibly thorough, I can't say enough really. [S/he] went into, straight away what it was, because what I couldn't understand was, why was I getting this pain in the top of my arm when it is a frozen shoulder, but why am I getting pain in the arm and not the shoulder?”

“What did [s/he] say?”

“[S/he] did me a diagram; [s/he] showed me a model of a skeleton.”

Participant 10

Relationships with specialists were generally reported as friendly and non-hierarchical, and conducive to the exchange of information. In general, however, there was over-reliance on verbal information, with very limited use of other media.

## DISCUSSION

### *Principal findings*

Patients' initial experience was characterised by severe, inexplicable pain followed by increasing restriction of movement. Overcoming these symptoms and recovering functional capacity was their priority. Understanding the cause, seriousness and likely outcome of the condition were also important to them. Reducing delay in diagnosis was a common plea with considerable anxiety, confusion and delay for those in the continued care of non-specialists. This was followed by a sense of relief on meeting a specialist, with gradual improvement ensuing in most cases. Most

1 A qualitative study of patients' perceptions and priorities when living with primary frozen shoulder  
2 MAIN DOCUMENT (article summary, body of text, references, editable tables)  
3 BMJ Open amended and resubmitted following peer review – 16/8/13

4 patients found hope and encouragement through this interaction, although elements  
5 of the condition remained inexplicable and uncertain. There was over-reliance on  
6 verbal communication and very little written information was provided.

### 7 *Strengths and weaknesses of the study*

8 This study is the first to focus on patients' experiences of conventional care  
9 pathways for this condition, and their priorities for treatment. These aspects, and the  
10 in-depth nature of our analysis, are major strengths.

11  
12  
13 Patients were recruited from care settings where the condition is typically managed;  
14 however some barriers to recruitment were experienced which have been identified  
15 previously, such as an initial hiatus in diagnosing the condition and approaching  
16 potential participants within a busy clinical setting. Recruitment issues are not  
17 uncommon and are well documented in other studies.<sup>20</sup> This was a small study  
18 which consequentially included data from a limited number of patients from a single  
19 geographical area. Although their own stories remain valid every possible theme  
20 would not necessarily be exhausted.<sup>21</sup> In addition two participants' experiences of FS  
21 was historical, so that, compared to recent cases, their contributions are likely to be  
22 more open to error of memory, and to reflect earlier approaches to care.  
23 Nevertheless the design included trustworthy methods such as using a standard  
24 protocol to introduce the study to prospective participants, selecting patients at  
25 different stages in the disease trajectory, using a topic schedule for interviews and  
26 recording interviews for transcription.  
27  
28

### 29 *Strengths and weaknesses in relation to other studies*

30 To our knowledge, and despite extensive searching,<sup>5</sup> there is no literature with which  
31 to directly compare our results. Carter<sup>14</sup> interviewed patients undergoing Bowen  
32 therapy for frozen shoulder, and very briefly described some experiential aspects of  
33 living with the condition, including pain, disturbed sleep, stiffness, impact on mood,  
34 and a disappointing interaction with a GP and a physiotherapist; all of which accord  
35 with our own, more searching, results. But Carter's<sup>14</sup> main focus was on the  
36 experience of Bowen therapy itself, limiting the applicability of her results; and  
37 patients' perceptions and priorities—dimensions considered critical by ourselves—  
38 were not addressed. Nor are our results directly comparable to those of Hush et al,<sup>15</sup>  
39 who systematically reviewed studies from Canada, UK, USA and Scandinavia and  
40 found high levels of patient-satisfaction with MSK physiotherapy. While our study  
41 indirectly encompassed patient satisfaction, it differed in its focus, both in terms of  
42 being specific to primary FS, and in terms of including experience of the broader  
43 care pathway, not physiotherapy alone. Nonetheless, the aspects of care most  
44 consistently identified by Hush et al<sup>15</sup> as important to patients were the personal and  
45 professional attributes of the clinician, explanation and communication of  
46 information, and treatment outcome. These findings are strongly reinforced by our  
47 own work. A consistent international observation is the lack of confidence of GPs in  
48 diagnosing subtypes of shoulder pain,<sup>22 23</sup> and this may have a critical bearing on  
49 the appropriateness and timing of care pathways for patients with shoulder  
50 conditions.  
51  
52  
53

54  
55 A key theme from our data was delays in diagnosis. Initially this tended to be a  
56 patient-initiated delay resulting from the participants waiting to see if the shoulder  
57 issues would resolve. Such patient-initiated delays are not unique to FS and can be  
58  
59  
60

A qualitative study of patients' perceptions and priorities when living with primary frozen shoulder  
MAIN DOCUMENT (article summary, body of text, references, editable tables)  
BMJ Open amended and resubmitted following peer review – 16/8/13

seen across a range health conditions. For example, Solbjør et al. highlighted that while some of the breast cancer patients in their study had delayed approaching their GP for 2 weeks, some had waited for longer than 3 months after they had found a lump.<sup>24</sup> When our participants did go to their GP they were often met with a failure to diagnose their condition or they were misdiagnosed. Again, this is not unique to FS; late or missed diagnosis has been cited as a contributory factor in poor outcomes for some cancers.<sup>25 26</sup> Furthermore, Pavey et al<sup>27</sup> in their research with patients with Motor Neurone Disease described the long journey to diagnosis as a 'diagnostic quest'.

Following diagnosis, it was evident from our data that FS had a major impact on the lives of our participants. Although FS is not a longer-term chronic condition such as multiple sclerosis or arthritis, it was clear that the participants in our study travelled along a similar trajectory to patients with such conditions. For example, Bury's notion that chronic health conditions are experienced as a 'biographically disruptive event' resonates very much with the experiences of our participants. Bury<sup>28</sup> identified the disruption of taken-for-granted behaviours such as general activities of daily living and the disruption of self-concept; all of which are supported by our data.

#### *Implications for clinicians and policymakers*

A care pathway with prompt diagnosis and access to specialist (or informed) care is required for sufferers of FS. There is potential for non-specialist healthcare staff, particularly GPs and physiotherapists, to be made more aware of this condition. This awareness would include diagnostic criteria, expectations, management strategies, and patients' needs for information and reassurance.

It is clear that, in some cases, there is a serious mismatch between clinicians' and patients' perceptions of the impact of FS. Strategies for educating clinicians are required, in order to convey the immense impact that frozen shoulder may have on sufferers' lives. Such education should ensure that active measures, to encourage timely resolution, are always offered.

There is a need to provide standardised, consistent information for patients, designed in collaboration with patients and based on the best available evidence. This information should address patients' questions and concerns, rather than clinicians' perceptions of what patients' questions and concerns should be. The information should be available in multiple formats in order to maximise its accessibility.

The Chartered Society of Physiotherapy's (CSP) clinical guidelines for FS and quick reference summary endeavour to address some of these issues.<sup>11 12</sup> Dissemination is now the key to connecting evidence and target audience. Awareness among other healthcare staff should be raised in order that their interaction with this patient group is apposite.

#### *Future research*

Our participants expressed a clear preference for early specialist referral; also a need for reassurance and timely, comprehensible advice and information in a variety of media. The evidence base underpinning the management of FS is not strong<sup>5 11</sup> and studies into the natural history of FS have produced somewhat contradictory

1 A qualitative study of patients' perceptions and priorities when living with primary frozen shoulder  
2 MAIN DOCUMENT (article summary, body of text, references, editable tables)

3 BMJ Open amended and resubmitted following peer review – 16/8/13

4 results.<sup>13 29</sup> A need for more primary research and for research of higher quality on  
5 FS has been identified elsewhere.<sup>5 11</sup> But clinicians could make better use of the  
6 evidence, limited though it is.

7  
8 Until recently, frozen shoulder research has lacked a focus on patients' perspectives.  
9 Patient involvement has yet to make appreciable inroads but this must change if  
10 such research is to be relevant. Unless the aspects of FS which most concern  
11 patients are known, generic shoulder pain Patient Reported Outcome Measures  
12 (PROMs)—used to measure condition severity and progress in such research, as  
13 well as in clinical practice—cannot be considered completely valid. Nor is it possible  
14 to develop a more sensitive, condition-specific PROM.<sup>30</sup> The present study, by  
15 exploring which aspects of FS patients most care about, contributes to a foundation  
16 for such validation and development.

### 17 18 **CONCLUSIONS**

19 Patients' perspectives on the experience of FS and their priorities for treatment have  
20 not previously been explored; however it is clear that this has been a major  
21 omission. Our study identified a number of issues that were important to patients.  
22 These included pain, but recovery from functional disability was often given higher  
23 priority. Anxiety was another key theme, and the struggle of living and dealing with  
24 FS was compounded, in some cases, by a lack of awareness on the part of  
25 healthcare professionals and, foremost, a failure to diagnose the condition.

26  
27  
28 To address these issues most effectively it is recommended that a diagnosis, even if  
29 only tentative, be quickly established for more patients. This would require GPs to  
30 recognise the salient diagnostic features. They and other healthcare workers should  
31 also be educated on the condition's impact on individuals, and accordingly the  
32 findings of the present study should be disseminated and built upon. Advice and  
33 information in various formats, reflecting the best available evidence, should be  
34 made readily available to patients. Finally, the evidence base for effectiveness of  
35 treatments needs to be expanded, maximally utilising patient participation. The  
36 present study, by exploring which aspects of FS patients most care about,  
37 contributes to this goal.  
38  
39  
40  
41  
42  
43  
44  
45  
46  
47  
48  
49  
50  
51  
52  
53  
54  
55  
56  
57  
58  
59  
60

1 A qualitative study of patients' perceptions and priorities when living with primary frozen shoulder  
2 MAIN DOCUMENT (article summary, body of text, references, editable tables)  
3 BMJ Open amended and resubmitted following peer review – 16/8/13  
4

### 5 **Data sharing**

6 Quotes and further details are available from Susan Jones at [Susan.Jones@tees.ac.uk](mailto:Susan.Jones@tees.ac.uk)  
7

### 8 **Funding**

9 None  
10

### 11 **Competing Interests**

12 Dr. Hanchard, Dr. Hamilton and Susan Jones have nothing to disclose. Dr. Rangan reports  
13 grants and personal fees from DePuy Ltd, personal fees from JRI Ltd, outside the submitted  
14 work; In addition, Dr. Rangan has a patent UK & European pending.  
15

### 16 **Contributorship**

17 AR initiated the concept and design, revised the draft and approved the final article; NH  
18 developed the idea for the study with SH and advised on musculoskeletal and physiotherapy  
19 aspects. NH wrote the background section of the article and contributed to the drafting and  
20 editing of the whole. SJ conducted the interviews, transcribed and analysed them, wrote up  
21 the findings and drafted the body of the article. SH supported SJ, reviewed the analysis,  
22 assisted in writing up the findings and contributed to developing and writing the article.  
23  
24  
25  
26  
27  
28  
29  
30  
31  
32  
33  
34  
35  
36  
37  
38  
39  
40  
41  
42  
43  
44  
45  
46  
47  
48  
49  
50  
51  
52  
53  
54  
55  
56  
57  
58  
59  
60

1 A qualitative study of patients' perceptions and priorities when living with primary frozen shoulder  
2 MAIN DOCUMENT (article summary, body of text, references, editable tables)  
3 BMJ Open amended and resubmitted following peer review – 16/8/13

## 4 References

- 5 1. Hand GCR, Athanasou NA, Matthews T, *et al*. The pathology of frozen shoulder. *J*  
6 *Bone Joint Surg Br*. 2007;89(7):928–32.
- 7  
8 2. Kelley MJ, McClure PW, Leggin BG. Frozen shoulder: evidence and a proposed  
9 model guiding rehabilitation. *J Orthop Sport Phys*. 2009;39(2):135–48.
- 10  
11 3. Robinson CM, Seah KTM, Chee YH, *et al*. Frozen shoulder. *J Bone Joint Surg Br*.  
12 2012;94(1):1–9. <http://www.ncbi.nlm.nih.gov/pubmed/22219239>
- 13  
14 4. Milgrom C, Novack V, Weil Y, *et al*. Risk factors for idiopathic frozen shoulder. *Isr*  
15 *Med Assoc J: IMAJ*. 2008;10(5):361–4.
- 16  
17 5. Maund E, Craig D, Suekarran S, *et al*. Management of frozen shoulder: a  
18 systematic review and cost-effectiveness analysis. *Health Technol Asses*  
19 *(Winchester, England)*. 2012;16(11):1–243.
- 20  
21 6. Walker-Bone K, Palmer KT, Reading I, *et al*. Prevalence and impact of  
22 musculoskeletal disorders of the upper limb in the general population. *Arthritis*  
23 *Rheum*. 2004;51(4):642–51.
- 24  
25 7. Bunker T. Time for a new name for frozen shoulder: Contracture of the shoulder.  
26 *Shoulder Elbow*. 2009;1(1):4-9.
- 27  
28 8. Shah N, Lewis M. Shoulder adhesive capsulitis: systematic review of randomised  
29 trials using multiple corticosteroid injections. *Br J Gen Pract*. 2007;57(541):662–667.
- 30  
31 9. Boyle-Walker KL, Gabard DL, Bietsch E, *et al*. A profile of patients with adhesive  
32 capsulitis. *J Hand Ther*. 1997;10:222–228.
- 33  
34 10. Codman EA. *Rupture of the supraspinatus tendon and other lesions in or about*  
35 *the subacromial bursa*. Boston: Privately published; 1934.
- 36  
37 11. Hanchard N, Goodchild L, Thompson J, *et al*. *Evidence-based clinical guidelines*  
38 *for the diagnosis, assessment and physiotherapy management of contracted (frozen)*  
39 *shoulder. Version 1.7: “standard” physiotherapy. Endorsed by the Chartered Society*  
40 *of Physiotherapy*. 2011. [www.csp.org.uk/skipp](http://www.csp.org.uk/skipp).
- 41  
42 12. Hanchard NCA, Goodchild L, Thompson J, *et al*. Evidence-based clinical  
43 guidelines for the diagnosis, assessment and physiotherapy management of  
44 contracted (frozen) shoulder: quick reference summary. *Physiotherapy*.  
45 2012;98(2):117–20. <http://dx.doi.org/10.1016/j.physio.2012.01.001>
- 46  
47 13. Hand C, Clipsham K, Rees JL, *et al*. Long-term outcome of frozen shoulder. *J*  
48 *Shoulder Elb Surg*. 2008;17(2):231–6.
- 49  
50 14. Carter B. Clients' experiences of frozen shoulder and its treatment with Bowen  
51 technique. *Compl Ther Nurs Midwifery*. 2002;8(4):204–10.
- 52  
53  
54  
55  
56  
57  
58  
59  
60



A qualitative study of patients' perceptions and priorities when living with primary frozen shoulder  
MAIN DOCUMENT (article summary, body of text, references, editable tables)  
BMJ Open amended and resubmitted following peer review – 16/8/13

15. Hush JM, Cameron K, Mackey M. Patient satisfaction with musculoskeletal physical therapy care: a systematic review. *Phys Ther.* 2011;91(1):25-36.
16. Rookmoneea M, Dennis L, Brealey S, *et al.* The effectiveness of interventions in the management of patients with primary frozen shoulder. *J Bone Joint Surg Br.* 2010;92(9):1267–72.
17. Patton MQ. *Qualitative research and evaluation methods* (3rd ed.). 2002. Thousand Oaks, CA: Sage.
18. Jack B. Giving them a voice: the value of qualitative research. *Nurse Researcher.* 2010; 17(3):4-6.
19. Braun V, Clarke V. Using thematic analysis in psychology. *Qual Res Psychol.* 2006;3(2):77–101.
20. Jones SE, Hamilton S, Perry L, *et al.* Developing workable research methods: lessons from a pilot study with vulnerable participants and complex assessments. *J Res Nurs.* 2011;16(4):307-318.
21. Depoy E, Gitlin LN. *Introduction to Research: Understanding and Applying Multiple Strategies.* 4th ed. St Louis: Elsevier Mosby; 2005:368.
22. Linsell L, Dawson J, Zondervan K, *et al.* Prevalence and incidence of adults consulting for shoulder conditions in UK primary care; patterns of diagnosis and referral. *Rheumatology (Oxford, England).* 2006;45(2):215–221.
23. Wofford JL, Mansfield RJ, Watkins RS. Patient characteristics and clinical management of patients with shoulder pain in U.S. primary care settings: secondary data analysis of the National Ambulatory Medical Care Survey. *BMC Musculoskel Dis.* 2005;6:4.  
<http://www.pubmedcentral.nih.gov/articlerender.fcgi?artid=549528&tool=pmcentrez&rendertype=abstract>
24. Solbjør M, Skolbekken J, Sætnan AR, *et al.* Could screening participation bias symptom interpretation? An interview study on women's interpretations of and responses to cancer symptoms between mammography screening rounds. *BMJ Open* 2012;2:e001508 doi:10.1136/bmjopen-2012-001508
25. Department of Health. *Cancer Reform Strategy.* 2007.  
[http://www.dh.gov.uk/en/Publicationsandstatistics/Publications/PublicationsPolicyAndGuidance/dh\\_081006](http://www.dh.gov.uk/en/Publicationsandstatistics/Publications/PublicationsPolicyAndGuidance/dh_081006)
26. National Patient Safety Agency. Delayed diagnosis of cancer: Thematic review March 2010.  
[http://www.ntac.nhs.uk/web/FILES/BreastLymphNode/nhs\\_\\_1281947508\\_Delayed\\_Diagnosis\\_of\\_Cancer\\_in.pdf](http://www.ntac.nhs.uk/web/FILES/BreastLymphNode/nhs__1281947508_Delayed_Diagnosis_of_Cancer_in.pdf)
27. Pavey A, Allen-Collinson J, Pavey T. The Lived Experience of Diagnosis Delivery in Motor Neurone Disease: A Sociological-Phenomenological Study. *Sociological*

1 A qualitative study of patients' perceptions and priorities when living with primary frozen shoulder  
2 MAIN DOCUMENT (article summary, body of text, references, editable tables)  
3 BMJ Open amended and resubmitted following peer review – 16/8/13  
4 *Research Online*, 2013;18(2)11. <http://www.socresonline.org.uk/18/2/11.html>  
5 10.5153/sro.2927

6  
7 28. Bury MR. Chronic illness as biographical disruption. *Sociol Health Ill.*  
8 1982;4(2):167-82.

9  
10 29. Binder AI, Bulgen DY, Hazleman BL, *et al.* Frozen shoulder: a long-term  
11 prospective study. *Ann Rheum Dis.* 1984;43(3):361–4.

12  
13 30. Department of Health. Guidance on the routine collection of Patient Reported  
14 Outcome Measures (PROMs). 2008.  
15 <http://www.mstrust.org.uk/competencies/downloads/NHS-PROMS.pdf>  
16

17  
18  
19  
20  
21  
22  
23  
24  
25  
26  
27  
28  
29  
30  
31  
32  
33  
34  
35  
36  
37  
38  
39  
40  
41  
42  
43  
44  
45  
46  
47  
48  
49  
50  
51  
52  
53  
54  
55  
56  
57  
58  
59  
60

Or peer review only

1  
2  
3  
4  
5  
6  
7  
8  
9  
10  
11  
12  
13  
14  
15  
16  
17  
18  
19  
20  
21  
22  
23  
24  
25  
26  
27  
28  
29  
30  
31  
32  
33  
34  
35  
36  
37  
38  
39  
40  
41  
42  
43  
44  
45  
46  
47  
48  
49

A qualitative study of patients' perceptions and priorities when living with primary frozen shoulder  
MAIN DOCUMENT (article summary, body of text, references, editable tables)  
BMJ Open amended and resubmitted following peer review – 16/8/13

Table 1: Participants' characteristics

| Participant number | Age in years | Gender | Diabetic | Group | Dominance of affected side at time of study* | Length of time from onset to 1 <sup>st</sup> consultation | Length of time from 1 <sup>st</sup> consultation to referral to MSK specialist | Where physiotherapy treatment was given                                                 |
|--------------------|--------------|--------|----------|-------|----------------------------------------------|-----------------------------------------------------------|--------------------------------------------------------------------------------|-----------------------------------------------------------------------------------------|
| 1                  | 60-69        | Female | No       | 1     | D                                            | Within 3 months                                           | 3 months                                                                       | Own practice - physiotherapist with MSK interest                                        |
| 2                  | 50-59        | Female | No       | 1 & 2 | ND & D                                       | Immediate<br>Within 2 months                              | Immediate<br>22 months                                                         | MSK community clinic<br>GP at own practice (not referred to MSK specialist)             |
| 3                  | 50-59        | Female | No       | 1     | D                                            | Within 2 months                                           | 0 months                                                                       | Own practice - physiotherapist with MSK interest                                        |
| 4                  | 50-59        | Female | No       | 2     | ND                                           | Unknown                                                   | Unknown                                                                        | Own practice physiotherapist (not referred to MSK specialist)                           |
| 5                  | 50-59        | Male   | No       | 2     | D                                            | Within 1 month                                            | 5 months                                                                       | Hospital MSK clinic                                                                     |
| 6                  | 40-49        | Male   | Yes      | 2     | D                                            | Within 2 months                                           | 3 months                                                                       | Occupational health physiotherapist<br>Own practice - physiotherapist with MSK interest |
| 7                  | 50-59        | Female | No       | 1     | ND                                           | Approx 5 months                                           | 0 months                                                                       | MSK community clinic                                                                    |
| 8                  | Over 70      | Male   | No       | 1     | D                                            | Within 3 months                                           | 0 months                                                                       | Own practice - physiotherapist with MSK interest                                        |
| 10                 | 50-59        | Female | No       | 2     | ND                                           | Within 2 months                                           | 6 months                                                                       | Generalist physiotherapist<br>MSK hospital clinic                                       |
| 11                 | 50-59        | Male   | Yes      | 3     | ND                                           | Within 2 months                                           | 8 months                                                                       | MSK hospital clinic                                                                     |
| 12                 | 50-59        | Male   | Yes      | 3     | ND                                           | Within 1 month                                            | 16 months                                                                      | Occupational health physiotherapist<br>MSK hospital clinic                              |

\* D = Dominant; ND = non-dominant. Notes: Participant 9 did not return calls/emails. Data in table derived from interviews with patients, medical records not accessed.

Figure 1: Thematic map

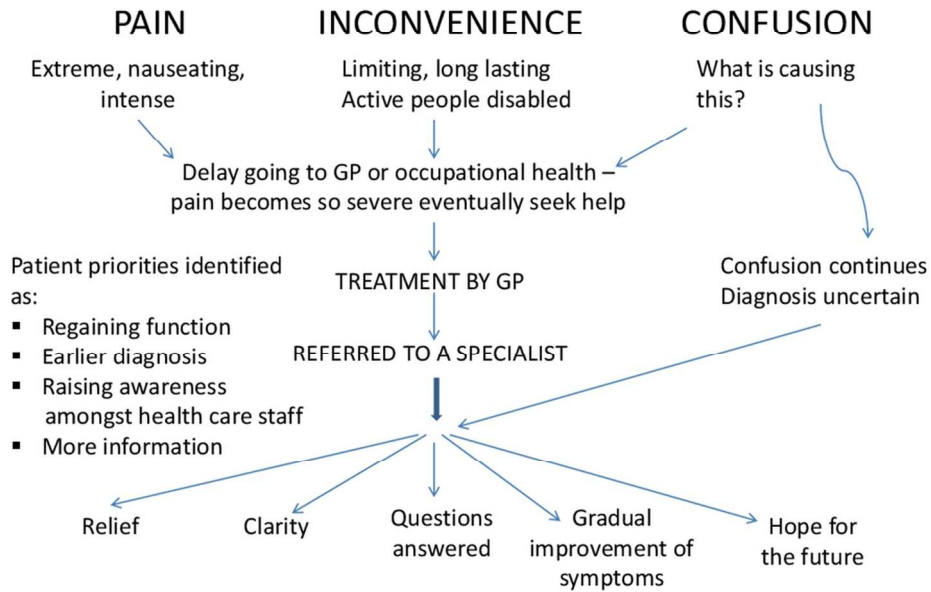

119x90mm (300 x 300 DPI)

Review only

A qualitative study of patients' perceptions and priorities when living with primary frozen shoulder

RESEARCH CHECKLIST FINAL for article for BMJ Open

Research checklist – COREQ (taken from Tong et al 2007)

No Item Guide questions/description

**Domain 1: Research team and reflexivity**

*Personal Characteristics*

- |                            |                                                                               |
|----------------------------|-------------------------------------------------------------------------------|
| 1. Interviewer/facilitator | Which author/s conducted the interview or focus group? <b>SJ</b>              |
| 2. Credentials             | What were the researcher's credentials? E.g. PhD, MD <b>MSc</b>               |
| 3. Occupation              | What was their occupation at the time of the study? <b>Research associate</b> |
| 4. Gender                  | Was the researcher male or female? <b>F</b>                                   |
| 5. Experience and training | What experience or training did the researcher have?                          |

**Research methods to master's degree level; 5 years' experience of working with qualitative research methods**

*Relationship with participants*

- |                             |                                                             |
|-----------------------------|-------------------------------------------------------------|
| 6. Relationship established | Was a relationship established prior to study commencement? |
|-----------------------------|-------------------------------------------------------------|

**No**

- |                                             |  |
|---------------------------------------------|--|
| 7. Participant knowledge of the Interviewer |  |
|---------------------------------------------|--|

What did the participants know about the researcher? e.g. personal goals, reasons for doing the research

**Study explained initially by physiotherapist treating their condition; no specific information about interviewer given; invitation and participant information sheet given before interview day with the following information:**

**We are researchers from Teesside University who are working with doctors and physiotherapists in the community and at James Cook University Hospital. We want to find out your views of living with frozen shoulder and so we would like to invite you to take part in this study.**

**What is the study for?**

**This study will help us to find out what is important to people suffering from frozen shoulder. What is found out will be used to design a larger study about treatment of this condition. This second study will give us more information about treatments that are available.**

**Why have I been asked to take part?**

**Health care staff will have given this information to you for us. We would like to find out the experiences and views of patients who are suffering from frozen shoulder.**

**This will help us to get a better understanding of what is important to you and how to improve our healthcare services.**

- |                                |                                                                                                                                           |
|--------------------------------|-------------------------------------------------------------------------------------------------------------------------------------------|
| 8. Interviewer characteristics | What characteristics were reported about the interviewer/facilitator? e.g. Bias, assumptions, reasons and interests in the research topic |
|--------------------------------|-------------------------------------------------------------------------------------------------------------------------------------------|

**The text states: "Interviews, transcription and subsequent data checking were undertaken by researchers with a nursing background and experience in qualitative**

A qualitative study of patients' perceptions and priorities when living with primary frozen shoulder

RESEARCH CHECKLIST FINAL for article for BMJ Open

**research (SJ, SH). These researchers were ideally placed, firstly because their core professional role is not directly involved in FS management (this facilitated objectivity); and secondly because their clinical backgrounds gave them insights into the nuances of patient-healthcare provider relationships."**

## Domain 2: study design

### *Theoretical framework*

#### 9. Methodological orientation and Theory

What methodological orientation was stated to underpin the study? e.g. grounded theory, discourse analysis, ethnography, phenomenology, content analysis

**The text states: "An inductive approach to analysis was taken, using a constant comparative method." "The data were independently analysed by two researchers using the six stage thematic approach outlined by Braun and Clarke." "Data were analysed after each interview and the findings informed the questions and topics for subsequent interviews."**

### *Participant selection*

#### 10. Sampling

How were participants selected? e.g. purposive, convenience, consecutive, snowball **Purposive**

#### 11. Method of approach

How were participants approached? e.g. face-to-face, telephone, mail, email

**Face-to-face using agreed standard protocol then telephone, email and/or letter from researcher as requested by potential participant.**

#### 12. Sample size

How many participants were in the study? **12**

#### 13. Non-participation

How many people refused to participate or dropped out? Reasons? **1, did not agree to interview**

### *Setting*

#### 14. Setting of data collection

Where was the data collected? e.g. home, clinic, workplace

**The text states: "Interviews took place on NHS or University premises or by telephone."**

#### 15. Presence of non-participants

Was anyone else present besides the participants and researchers? **No**

#### 16. Description of sample

What are the important characteristics of the sample? e.g. demographic data, date **Gender, age, history of condition,**

### **dates of data collection**

#### *Data collection*

#### 17. Interview guide

Were questions, prompts, guides provided by the authors?

Was it pilot tested? **Text states: "using a topic schedule for**

**Interviews" "Questions related to the particular phase currently experienced by participants but also included questions about the previous phase, where applicable. The interviews mainly comprised open questions to encourage the participants to tell their stories." It was not pilot tested.**

#### 18. Repeat interviews

Were repeat interviews carried out? **No** If yes, how many?

#### 19. Audio/visual recording

Did the research use audio or visual recording to collect the data? **Audio recording of interviews**

#### 20. Field notes

Were field notes made during and/or after the interview or focus group? **Yes**

#### 21. Duration

What was the duration of the interviews or focus group? **30-45**

#### **minutes**

#### 22. Data saturation

Was data saturation discussed? **Yes**

A qualitative study of patients' perceptions and priorities when living with primary frozen shoulder

RESEARCH CHECKLIST FINAL for article for BMJ Open

23. Transcripts returned      Were transcripts returned to participants for comment and/or correction? **No**

### Domain 3: analysis and findings

#### *Data analysis*

24. Number of data coders      How many data coders coded the data? **1 principal coder; 1 independent checker**

25. Description of the coding tree

Did authors provide a description of the coding tree? **No**

26. Derivation of themes      Were themes identified in advance or derived from the data?

**Inductive approach, derived from the data**

27. Software      What software, if applicable, was used to manage the data?

**Nvivo 9**

28. Participant checking      Did participants provide feedback on the findings? **No**

#### *Reporting*

29. Quotations presented      Were participant quotations presented to illustrate the themes / findings? Was each quotation identified? e.g. participant number **Yes**

30. Data and findings consistent

Was there consistency between the data presented and the findings? **Yes**

31. Clarity of major themes      Were major themes clearly presented in the findings? **Yes**

32. Clarity of minor themes      Is there a description of diverse cases or discussion of minor themes? **Historical aspect, bilateral cases**

### REFERENCE

Tong A, Sainsbury P, Craig J. Consolidated criteria for reporting qualitative research (COREQ): a 32-item checklist for interviews and focus groups. *International Journal for Quality in Health Care*. 2007;19(6):349–357.

A qualitative study of patients' perceptions and priorities when living with primary frozen shoulder  
MAIN DOCUMENT (article summary, body of text, references, editable tables)  
BMJ Open amended and resubmitted following peer review – 16/8/13

## Article Summary

### Article focus

- The experiences and perceptions of people living with primary frozen shoulder, and their priorities for treatment.

### Key messages

- Primary frozen shoulder causes severe pain and restricts activities of daily living. Incorrect or delayed diagnoses often amplify patient anxiety and hold up treatment.
- Care pathways are needed with prompt diagnosis and access to specialist (or informed) care. Raising awareness of the diagnostic criteria and management options among non-specialist healthcare staff—especially GPs and physiotherapists—should make this more achievable.
- Translation of evidence to the target audience of non-specialist healthcare professionals is a priority.

### Strengths and limitations of this study

This study is the first to focus on patients' experiences of conventional care pathways for frozen shoulder, and their priorities for treatment.

Patients were recruited from care settings where the condition is typically managed. The number of participants was small, so the findings must be considered indicative rather than conclusive, but enough repetition took place to be confident in the themes identified. In addition, two participants' experience of frozen shoulder was retrospective. Compared to recent cases, their contributions are likely to be more open to error of memory, and to reflect less current approaches to care.

Nevertheless the design included trustworthy methods with clear reporting, allowing readers to make their own judgement on trustworthiness. As the work published on this topic is very limited this article makes a valuable contribution.

## INTRODUCTION

Frozen shoulder (FS) is a condition affecting the capsule of the shoulder joint, and is characterised by inflammation and contracture.<sup>1</sup> These events may occur for no identifiable reason in "primary" or "idiopathic" FS. "Secondary" FS is associated with some other event or condition: the most common associated event is trauma,<sup>2</sup> whereas associated conditions include rotator cuff disease, hemiparesis and others.<sup>3</sup> Diabetes is a known risk factor for FS.<sup>4</sup> Some authorities consider FS associated with diabetes to be a "primary" type, and others consider it "secondary".<sup>5</sup>

FS affects around 10% of the general adult population,<sup>6</sup> men and women approximately equally,<sup>6,7</sup> and the prevalence of those seeking help is 2 to 5%.<sup>8</sup> To our knowledge, there are no published data on the relative prevalence of primary and secondary FS. However, FS of no detectable cause is thought to predominate, with patients whose FS is associated with diabetes constituting an additional "substantial" group,<sup>3</sup> accounting for almost one-third of all FS.<sup>7</sup>

The healthcare implications of FS are considerable. In the UK, for example, based on a single GP consultation for each case, it costs the National Health Service at least £44.1 million (assuming a prevalence of 2%) or £110.3 million (assuming a



1 A qualitative study of patients' perceptions and priorities when living with primary frozen shoulder  
2 MAIN DOCUMENT (article summary, body of text, references, editable tables)  
3 BMJ Open amended and resubmitted following peer review – 16/8/13  
4 prevalence of 5%). And since the usual age at onset is 40-60 years,<sup>9</sup> which is  
5 typically within the working-age range, there is a crucial economic impact on  
6 individuals and society.

7 Codman, who coined the term frozen shoulder, described the typical clinical  
8 manifestation as early as 1934:  
9

10 “The condition [comes] on slowly; pain usually felt near the insertion of the  
11 deltoid; inability to sleep on the affected side; painful and incomplete elevation  
12 and external rotation; restriction of both spasmodic and mildly adherent type;  
13 atrophy of the spinati; little local tenderness; X-rays negative except for bone  
14 atrophy.”<sup>10</sup>  
15  
16

17 However, the location of pain may be variable<sup>9</sup> and diagnosis may present a  
18 challenge, particularly for the non-specialist, and particularly in the early stages,  
19 when the signs are not pronounced: not least because false positive responses to  
20 standard tests for shoulder impingement (Neer's sign, Hawkins' test) are to be  
21 expected.<sup>11</sup>  
22  
23

24 Recognising FS as phasic in nature, the recent UK guidelines for diagnosis,  
25 assessment and physiotherapy management of FS recommend a simple  
26 dichotomous “pain predominant” or “stiffness predominant” classification, whereby  
27 the patient is the arbiter of the stage, and pain takes precedence when there is  
28 ambiguity.<sup>11</sup> Potential interventions include watchful waiting, physiotherapy, steroid  
29 injection, distension arthrography, manipulation under anaesthetic (MUA) and  
30 arthroscopic capsular release.<sup>5 11</sup> There is some evidence for specific interventions,  
31 although none of this is strong,<sup>5 11</sup> and not all observational series have verified the  
32 certainty of complete recovery. For example, in a recent study of 223 patients with  
33 FS referred to tertiary care, 38% had persistent mild symptoms, mostly pain, at a  
34 mean follow-up of 4.4 years (range 2 to 20 years). In 3% the persistent symptoms  
35 were severe, with pain and functional deficits.<sup>13</sup>  
36  
37

38 Despite a general appreciation that the condition imposes a serious burden on  
39 sufferers, the research literature demonstrates a lack of interest in the subjective  
40 experience of FS and patients' priorities for treatment. A recent systematic review  
41 commissioned by the UK Department of Health sought studies on patients' views of  
42 conventional treatments, but found none.<sup>5</sup> A similar search without restriction on  
43 treatment type revealed just one study, focused on Bowen therapy and providing  
44 only limited insights.<sup>14</sup> This paucity is surprising, as there is evidence to show that  
45 patients' attitude towards treatment significantly affects concordance, including in  
46 musculoskeletal (MSK) conditions.<sup>15</sup> Therefore it is important to consider the patient  
47 perspective when assessing overall treatment effectiveness.<sup>15</sup> This has become  
48 increasingly relevant with the move towards a patient-centred paradigm of  
49 healthcare.<sup>15</sup> This paper seeks to qualitatively explore the experiences and  
50 perceptions of people living with primary frozen shoulder, and their priorities for  
51 treatment.  
52  
53  
54  
55  
56  
57  
58  
59  
60

1 A qualitative study of patients' perceptions and priorities when living with primary frozen shoulder  
2 MAIN DOCUMENT (article summary, body of text, references, editable tables)  
3 BMJ Open amended and resubmitted following peer review – 16/8/13

## 4 **METHODS**

5 A qualitative study design employing semi-structured interviews was used to explore  
6 the experiences, priorities and perceptions of those experiencing the different  
7 phases of primary FS. Primary FS was chosen as the inclusion of secondary FS  
8 might have resulted in excessive heterogeneity.

### 9 **Participants**

#### 10 ***Inclusion criteria***

11 Adult, male and female patients of any age, with or without diabetes, who had been  
12 diagnosed with primary FS by the following criteria:

- 14 • shoulder pain for at least one month;
- 15 • reduction in passive external rotation of 50% or more compared to the  
16 contralateral side<sup>16</sup> with a clinically significant change in end-feel;
- 17 • no clinical suspicion of other pathologies that might present similarly; and
- 18 • normal X-rays (only if clinically indicated).

### 20 **Recruitment**

21 Recruitment occurred in community and hospital settings. Clinical members of the  
22 research team who recruited participants from the community worked in a general  
23 medical practice; however in addition to their own surgery clinics they also recruited  
24 from clinics that they ran in collaboration with other specialist doctors and  
25 physiotherapists, which were spread across the community. The patients recruited  
26 from the MSK and hospital-based clinics had been referred to specialist services.

### 29 **Sampling**

30 **A structured, purposive sample of patients in the different phases of FS,<sup>17</sup> as defined**  
31 **by the UK guidelines,<sup>11</sup> with a story to tell,<sup>18</sup> was selected by the clinicians.** Group 1  
32 comprised patients in the pain predominant phase and was drawn exclusively from  
33 community care; group 2 were in the stiffness predominant phase, drawn from both  
34 community and secondary care (i.e. the hospital setting); and group 3 were in the  
35 residual stiffness predominant phase following hospital treatment, and drawn  
36 exclusively from secondary care. Clinicians were given a standard protocol to use,  
37 which provided basic details of the study and what would be required of participants.  
38 Patients were given an introductory pack which included an information sheet and  
39 contact details, requesting that they respond directly to the research team. When a  
40 potential participant contacted the team they were given the opportunity to ask any  
41 questions prior to arranging an interview. **Twenty-two packs were handed out and**  
42 **twelve patients responded; none were excluded. The demographic characteristics of**  
43 **the sample were consistent with the FS population across the UK at large.<sup>6 7</sup>**

### 47 **Data collection**

48 Interviews took place on NHS or University premises or by telephone. Each  
49 commenced by establishing informed consent. Interviewees were then allowed the  
50 opportunity to give detailed descriptions of their experiences, with individual  
51 interviews lasting approximately 30-45 minutes. Schedules comprising the topics to  
52 be covered and a range of prompts relating to specific issues of interest were used  
53 to guide data collection during interviews. Questions related to the particular phase  
54 currently experienced by participants but also included questions about the previous  
55 phase, where applicable. The interviews mainly comprised open questions to  
56 encourage the participants to tell their stories. Field notes were made of  
57  
58  
59  
60

A qualitative study of patients' perceptions and priorities when living with primary frozen shoulder  
MAIN DOCUMENT (article summary, body of text, references, editable tables)  
BMJ Open amended and resubmitted following peer review – 16/8/13

observations to supplement the transcripts. Credibility was demonstrated by confirmation of information from multiple participants leading to identification of common themes. Interviews were audio recorded with the permission of participants and later transcribed. Interviews, transcription and subsequent data checking were undertaken by healthcare researchers experienced in qualitative research (SJ, SH).

### Data analysis

An inductive approach to analysis was taken, using a constant comparative method. Data were analysed after each interview and the findings informed the questions and topics for subsequent interviews. The data were independently analysed by two researchers using the six stage thematic approach outlined by Braun and Clarke.<sup>19</sup> An in-depth familiarisation with the data was followed by the generation of initial codes, using Nvivo 9, which were then applied to the data and collated into potential themes independently by the researchers. These themes were then reviewed, generating a thematic map of the analysis. In the next stage the themes were refined and named. Finally, examples were selected to illustrate the thematic framework.

## RESULTS

### Participants

Data collection occurred between July 2011 and November 2011. Twelve participants were recruited, and eleven agreed to be interviewed. Five met the criteria for group 1, four for group 2 and two for group 3 (see Table 1). They included six women and five men, aged from 40 years upwards, predominantly in their fifties (n=7). Three of the men had diabetes and formed the younger end of the group, with two in their forties and one in his early fifties. Three participants had experienced FS in both shoulders (though none on both sides concurrently). One participant may have experienced FS in both shoulders, but could not remember the diagnosis given for the first-affected shoulder. One participant, with a previous history of impingement (not FS) in the contralateral shoulder, was initially given the same diagnosis on the currently affected side, but was subsequently diagnosed with FS. Two of the participants had suffered with FS several years ago and were recruited as their history was known to the physiotherapist.

### Contexts of participant journeys

One participant consulted a GP one week after the start of symptoms but all the others waited six to eight weeks before presenting for a consultation. After initial presentation they followed various paths towards specialist treatment. Some participants experienced delay in receiving a definitive diagnosis and specialist (i.e. MSK or shoulder specialist) care (see Table 1).

### Thematic analysis

Four major patient-reported themes associated with FS were identified and are shown in the thematic map (Figure 1).

### Figure 1:

### THEMATIC MAP - HERE

#### Theme 1: Pain

Patients reported that the pain would start quite suddenly and gradually worsen over weeks and months. During the initial (pain predominant) phase the pain would be

1 A qualitative study of patients' perceptions and priorities when living with primary frozen shoulder  
2 MAIN DOCUMENT (article summary, body of text, references, editable tables)  
3 BMJ Open amended and resubmitted following peer review – 16/8/13

4 very intense on certain movements, typically stretching or reaching in specific  
5 directions. Unguarded movement, in particular, caused severe pain. Also, sleep was  
6 badly disturbed. Once awake, participants struggled to get back to sleep due to  
7 constant, "nagging" pain. Sleep deprivation wore participants down, even though  
8 they reported taking a resilient approach. In an attempt to manage their pain,  
9 participants tried to avoid painful movements, applied ointments and took  
10 medication. The nature of the pain was such that they worried about what could be  
11 the cause.

12  
13 "The amount of pain that I was in, I didn't believe that it was just a frozen  
14 shoulder." Participant 12

15  
16 Finding a way to deal with the pain and carry on with life as normally as possible was  
17 very important to participants.  
18

### 19 **Theme 2: Awareness and expectations**

20 Participants did not successfully self-diagnose their problem. Typically they thought  
21 they had 'pulled something', anticipating that it would resolve in a week or two.  
22 Diagnosis also presented a challenge amongst non-specialist healthcare staff.  
23

24  
25 "I made an appointment at the doctors and the doctor, having examined me,  
26 said, 'you are lucky it isn't a frozen shoulder, I think that what you have done is  
27 you have trapped a nerve, you have some slight nerve damage, you just need  
28 to rest, it will take a couple of months.'" Participant 5  
29

30  
31 Lack of diagnosis or misdiagnosis led to diverse consequences among the  
32 participants e.g. anxiety; denial; and delays in definitive diagnosis and referral.  
33 Participants were often left with unanswered questions, uncertainty as to the  
34 treatment options and the potential risks and benefits of treatment and, occasionally,  
35 with contradictory advice.  
36

37  
38 "... you want to know where the final outcome is going to be rather than you  
39 suffering week in week out thinking, 'when is it going to end? Fed up with this.'  
40 Whereas when you know it is going to last 3 or 4 years down the line, I know it  
41 is not going to be forever. Whereas you don't know anything; God, is this ever  
42 going to go away? I think I would like to know from the start." Participant 11  
43

44  
45 "I don't know whether I wasn't saying the right things to [my GP] or what .... I  
46 don't know whether it is my relationship with the doctor or what, but I don't ...  
47 I'm not very good, if they are vague and I don't understand what they are  
48 talking about, I won't sit there any longer, I'll, I'll leave. All I wanted was an  
49 answer." Participant 12  
50

51 Participants who did not receive early informed or specialist care would have  
52 preferred a quick, clear pathway; and although they understood the difficulty of  
53 diagnosis, some expressed disappointment that they had suffered, for what seemed  
54 to them, longer than necessary, due to a lack of awareness of the condition on the  
55 part of their healthcare providers  
56  
57  
58  
59  
60

A qualitative study of patients' perceptions and priorities when living with primary frozen shoulder  
MAIN DOCUMENT (article summary, body of text, references, editable tables)  
BMJ Open amended and resubmitted following peer review – 16/8/13

“With the shoulder, I was saying, ‘it’s still hurting’ and they [the GPs] were saying ‘we’ll look to see what else it is then.’ Every time, something came back as, ‘no, it’s negative. Have you got any neck problem, shoulder problem, anything like that?’ No arthritis, no swelling in it ... but every time it come back no, you are thinking, now what?” Participant 7 [first-affected shoulder, 2004]

### **Theme 3: Inconvenience/disability**

Typically the FS lasted from one to three years. In a group of people who were usually active, this was hugely disruptive. The inability to use the arm normally, initially due to pain, gradually giving way to stiffness, affected even very fundamental activities of daily living (ADL), including, among others, hair washing and styling, getting out of a bath, dressing, reaching into a back pocket, opening a door, pegging washing out, washing up and other housework, home maintenance jobs, lifting a kettle, cutting up food, pulling a suitcase or wheeled shopping basket, gardening and, when driving, changing gear or positioning for reversing. In order to continue to drive, one participant had to buy a car with automatic transmission.

“Try getting out the bath ‘cause you can’t find a way up. You just cannot find a way to get out the bath! We’ve got bars on the side of the bath anyway but I couldn’t find a way. I just had to snake over the side sometimes.” Participant 7

Participants who worked had to change their work routines to accommodate their limitations; one, for whom this was not possible, had to resign

A general observation was that the pain and these major impairments in ADL occurred without obvious outward signs, so that much of the suffering involved was hidden from the casual observer. This led to much less sympathy than would be the case with many conditions.

“I was still doing the workload as such, so you don’t get any, it’s awful to say, you don’t get any sympathy from people because it is not something that stops you doing things but in yourself you feel so frustrated, because when I reached up to do anything, we do a lot of overhead stuff, there was no strength in the arm, it was very painful but nobody would say, “How is it?” You felt that they didn’t understand, because you are at work with it and that was the hardest thing, and they still expected you to do things because you didn’t have your arm strapped up.” Participant 10

A further cause of hidden suffering was that other people relied on their own experiences of pain when trying to understand the participants’ perspective but it was outside their lexicon of knowledge. Three participants recognised that they themselves had not understood what it was like or been sufficiently sympathetic towards others with FS until they acquired it themselves.

“I’ve heard of other people with frozen shoulders and I’m afraid I haven’t given them much sympathy because I didn’t know what it involved. You would be in the same boat. I sympathised, say that’s terrible, but really unless you have or have had a frozen shoulder you don’t know how painful it is. It is really excruciating.” Participant 8

1 A qualitative study of patients' perceptions and priorities when living with primary frozen shoulder  
2 MAIN DOCUMENT (article summary, body of text, references, editable tables)  
3 BMJ Open amended and resubmitted following peer review – 16/8/13

4 In general, so long as the FS was seen as temporary and benign, and they could  
5 care for themselves and keep their jobs until they recovered, participants  
6 accepted their situation; at the same time, they hoped for the earliest possible  
7 resolution.

#### 8 **Theme 4: Treatment**

9 Participants identified functional outcomes e.g. freedom of movement as their main  
10 priority from treatment; however they recognised that if the pain or stiffness remained  
11 they would be unable to recover the movement. On presentation at the GP's surgery,  
12 reflecting the lack of a definitive diagnosis in most cases, there was no standard  
13 course of treatment offered. Two participants came via their occupational health  
14 physiotherapy services then to their GPs. Neither of them received a diagnosis of FS  
15 either. Some GPs opted to wait and see and most prescribed analgesics. As time  
16 passed some offered further investigations and/or administered further first-line  
17 treatment themselves, while others referred patients to an on-site physiotherapist, or  
18 to a primary or secondary care MSK clinic.  
19

20  
21 The range of first-line treatments experienced by the participants from their GPs  
22 included ointment, medications and local injections. On referral to the  
23 physiotherapist, treatment might include advice and education, hands-on passive  
24 mobilisation, exercises, local injections, heat, massage, ultrasound, transcutaneous  
25 electrical nerve stimulation (TENS), acupuncture or hydrotherapy.  
26  
27

28 All participants had received some physiotherapy due in part to the recruitment  
29 pathways into the study. **Some participants were referred swiftly to a specialist**  
30 **physiotherapist, a factor which may have been influenced by the involvement of a**  
31 **surgery with a physiotherapist specialising in MSK and FS.** In other cases  
32 participants were referred, only after lengthy periods of care by an occupational  
33 physiotherapist and/or their own GP, to a specialist physiotherapist, a GP with a  
34 special interest in MSK conditions or a consultant shoulder and elbow surgeon. Two  
35 participants received surgical interventions: manipulation under anaesthetic and an  
36 operative capsular release, respectively.  
37  
38

39 MSK specialists, whether specialist physiotherapists, GPs with a special interest or  
40 surgeons, were available in various locations. There were sometimes delays in  
41 referral to these specialists, but once referred, participants reported positively on  
42 their care in each location. Definitive diagnoses were made or confirmed. Referral  
43 also brought an understanding approach, clarity and relief; participants expressed  
44 profound relief at knowing what the problem was and being in the care of someone  
45 who knew about the condition. Some of their worries could be explained and their  
46 questions answered. This was very important to them.  
47  
48

49 “[S/he] went into extreme [detail], were there any questions, [s/he] was so  
50 incredibly thorough, I can't say enough really. [S/he] went into, straight away  
51 what it was, because what I couldn't understand was, why was I getting this  
52 pain in the top of my arm when it is a frozen shoulder, but why am I getting pain  
53 in the arm and not the shoulder?”

54 “What did [s/he] say?”

55 “[S/he] did me a diagram; [s/he] showed me a model of a skeleton.”

56 Participant 10  
57  
58  
59  
60

A qualitative study of patients' perceptions and priorities when living with primary frozen shoulder  
MAIN DOCUMENT (article summary, body of text, references, editable tables)  
BMJ Open amended and resubmitted following peer review – 16/8/13

Relationships with specialists were generally reported as friendly and non-hierarchical, and conducive to the exchange of information. In general, however, there was over-reliance on verbal information, with very limited use of other media.

## DISCUSSION

### *Principal findings*

Patients' initial experience was characterised by severe, inexplicable pain followed by increasing restriction of movement. Overcoming these symptoms and recovering functional capacity was their priority. Understanding the cause, seriousness and likely outcome of the condition were also important to them. Reducing delay in diagnosis was a common plea with considerable anxiety, confusion and delay for those in the continued care of non-specialists. This was followed by a sense of relief on meeting a specialist, with gradual improvement ensuing in most cases. Most patients found hope and encouragement through this interaction, although elements of the condition remained inexplicable and uncertain. There was over-reliance on verbal communication and very little written information was provided.

### *Strengths and weaknesses of the study*

This study is the first to focus on patients' experiences of conventional care pathways for this condition, and their priorities for treatment. These aspects, and the in-depth nature of our analysis, are major strengths.

Patients were recruited from care settings where the condition is typically managed; however some barriers to recruitment were experienced which have been identified previously, such as an initial hiatus in diagnosing the condition and approaching potential participants within a busy clinical setting. Recruitment issues are not uncommon and are well documented in other studies.<sup>20</sup> This was a small study which consequentially included data from a limited number of patients from a single geographical area. Although their own stories remain valid every possible theme would not necessarily be exhausted.<sup>21</sup> In addition two participants' experiences of FS was historical, so that, compared to recent cases, their contributions are likely to be more open to error of memory, and to reflect earlier approaches to care. Nevertheless the design included trustworthy methods such as using a standard protocol to introduce the study to prospective participants, selecting patients at different stages in the disease trajectory, using a topic schedule for interviews and recording interviews for transcription.

### *Strengths and weaknesses in relation to other studies*

To our knowledge, and despite extensive searching,<sup>5</sup> there is no literature with which to directly compare our results. Carter<sup>14</sup> interviewed patients undergoing Bowen therapy for frozen shoulder, and very briefly described some experiential aspects of living with the condition, including pain, disturbed sleep, stiffness, impact on mood, and a disappointing interaction with a GP and a physiotherapist; all of which accord with our own, more searching, results. But Carter's<sup>14</sup> main focus was on the experience of Bowen therapy itself, limiting the applicability of her results; and patients' perceptions and priorities—dimensions considered critical by ourselves—were not addressed. Nor are our results directly comparable to those of Hush et al,<sup>15</sup> who systematically reviewed studies from Canada, UK, USA and Scandinavia and found high levels of patient-satisfaction with MSK physiotherapy. While our study

1 A qualitative study of patients' perceptions and priorities when living with primary frozen shoulder  
2 MAIN DOCUMENT (article summary, body of text, references, editable tables)  
3 BMJ Open amended and resubmitted following peer review – 16/8/13

4 indirectly encompassed patient satisfaction, it differed in its focus, both in terms of  
5 being specific to primary FS, and in terms of including experience of the broader  
6 care pathway, not physiotherapy alone. Nonetheless, the aspects of care most  
7 consistently identified by Hush et al<sup>15</sup> as important to patients were the personal and  
8 professional attributes of the clinician, explanation and communication of  
9 information, and treatment outcome. These findings are strongly reinforced by our  
10 own work. A consistent international observation is the lack of confidence of GPs in  
11 diagnosing subtypes of shoulder pain,<sup>22 23</sup> and this may have a critical bearing on  
12 the appropriateness and timing of care pathways for patients with shoulder  
13 conditions.

14  
15 A key theme from our data was delays in diagnosis. Initially this tended to be a  
16 patient-initiated delay resulting from the participants waiting to see if the shoulder  
17 issues would resolve. Such patient-initiated delays are not unique to FS and can be  
18 seen across a range health conditions. For example, Solbjør et al. highlighted that  
19 while some of the breast cancer patients in their study had delayed approaching their  
20 GP for 2 weeks, some had waited for longer than 3 months after they had found a  
21 lump.<sup>24</sup> When our participants did go to their GP they were often met with a failure to  
22 diagnose their condition or they were misdiagnosed. Again, this is not unique to FS;  
23 late or missed diagnosis has been cited as a contributory factor in poor outcomes for  
24 some cancers.<sup>25 26</sup> Furthermore, Pavey et al<sup>27</sup> in their research with patients with  
25 Motor Neurone Disease described the long journey to diagnosis as a 'diagnostic  
26 quest'.  
27

28  
29 Following diagnosis, it was evident from our data that FS had a major impact on the  
30 lives of our participants. Although FS is not a longer-term chronic condition such as  
31 multiple sclerosis or arthritis, it was clear that the participants in our study travelled  
32 along a similar trajectory to patients with such conditions. For example, Bury's notion  
33 that chronic health conditions are experienced as a 'biographically disruptive event'  
34 resonates very much with the experiences of our participants. Bury<sup>28</sup> identified the  
35 disruption of taken-for-granted behaviours such as general activities of daily living  
36 and the disruption of self-concept; all of which are supported by our data.  
37  
38

### 39 *Implications for clinicians and policymakers*

40 A care pathway with prompt diagnosis and access to specialist (or informed) care is  
41 required for sufferers of FS. There is potential for non-specialist healthcare staff,  
42 particularly GPs and physiotherapists, to be made more aware of this condition. This  
43 awareness would include diagnostic criteria, expectations, management strategies,  
44 and patients' needs for information and reassurance.  
45  
46

47 It is clear that, in some cases, there is a serious mismatch between clinicians' and  
48 patients' perceptions of the impact of FS. Strategies for educating clinicians are  
49 required, in order to convey the immense impact that frozen shoulder may have on  
50 sufferers' lives. Such education should ensure that active measures, to encourage  
51 timely resolution, are always offered.  
52

53  
54 There is a need to provide standardised, consistent information for patients,  
55 designed in collaboration with patients and based on the best available evidence.  
56 This information should address patients' questions and concerns, rather than  
57 clinicians' perceptions of what patients' questions and concerns should be. The  
58  
59  
60



1 A qualitative study of patients' perceptions and priorities when living with primary frozen shoulder  
2 MAIN DOCUMENT (article summary, body of text, references, editable tables)  
3 BMJ Open amended and resubmitted following peer review – 16/8/13  
4 information should be available in multiple formats in order to maximise its  
5 accessibility.

6 The Chartered Society of Physiotherapy's (CSP) clinical guidelines for FS and quick  
7 reference summary endeavour to address some of these issues.<sup>11 12</sup> Dissemination  
8 is now the key to connecting evidence and target audience. Awareness among other  
9 healthcare staff should be raised in order that their interaction with this patient group  
10 is apposite.

### 11 *Future research*

12 Our participants expressed a clear preference for early specialist referral; also a  
13 need for reassurance and timely, comprehensible advice and information in a variety  
14 of media. The evidence base underpinning the management of FS is not strong<sup>5 11</sup>  
15 and studies into the natural history of FS have produced somewhat contradictory  
16 results.<sup>13 29</sup> A need for more primary research and for research of higher quality on  
17 FS has been identified elsewhere.<sup>5 11</sup> But clinicians could make better use of the  
18 evidence, limited though it is.

19 **Until recently, frozen shoulder research has lacked a focus on patients' perspectives.**  
20 Patient involvement has yet to make appreciable inroads but this must change if  
21 such research is to be relevant. Unless the aspects of FS which most concern  
22 patients are known, generic shoulder pain Patient Reported Outcome Measures  
23 (PROMs)—used to measure condition severity and progress in such research, as  
24 well as in clinical practice—cannot be considered completely valid. Nor is it possible  
25 to develop a more sensitive, condition-specific PROM.<sup>30</sup> The present study, by  
26 exploring which aspects of FS patients most care about, contributes to a foundation  
27 for such validation and development.

### 28 **CONCLUSIONS**

29 Patients' perspectives on the experience of FS and their priorities for treatment have  
30 not previously been explored; however it is clear that this has been a major  
31 omission. Our study identified a number of issues that were important to patients.  
32 These included pain, but recovery from functional disability was often given higher  
33 priority. Anxiety was another key theme, and the struggle of living and dealing with  
34 FS was compounded, in some cases, by a lack of awareness on the part of  
35 healthcare professionals and, foremost, a failure to diagnose the condition.

36 To address these issues most effectively it is recommended that a diagnosis, even if  
37 only tentative, be quickly established for more patients. This would require GPs to  
38 recognise the salient diagnostic features. They and other healthcare workers should  
39 also be educated on the condition's impact on individuals, and accordingly the  
40 findings of the present study should be disseminated and built upon. Advice and  
41 information in various formats, reflecting the best available evidence, should be  
42 made readily available to patients. Finally, the evidence base for effectiveness of  
43 treatments needs to be expanded, maximally utilising patient participation. The  
44 present study, by exploring which aspects of FS patients most care about,  
45 contributes to this goal.

A qualitative study of patients' perceptions and priorities when living with primary frozen shoulder  
MAIN DOCUMENT (article summary, body of text, references, editable tables)  
BMJ Open amended and resubmitted following peer review – 16/8/13

## References

1. Hand GCR, Athanasou NA, Matthews T, *et al.* The pathology of frozen shoulder. *J Bone Joint Surg Br.* 2007;89(7):928–32.
2. Kelley MJ, McClure PW, Leggin BG. Frozen shoulder: evidence and a proposed model guiding rehabilitation. *J Orthop Sport Phys.* 2009;39(2):135–48.
3. Robinson CM, Seah KTM, Chee YH, *et al.* Frozen shoulder. *J Bone Joint Surg Br.* 2012;94(1):1–9. <http://www.ncbi.nlm.nih.gov/pubmed/22219239>
4. Milgrom C, Novack V, Weil Y, *et al.* Risk factors for idiopathic frozen shoulder. *Isr Med Assoc J: IMAJ.* 2008;10(5):361–4.
5. Maund E, Craig D, Suekarran S, *et al.* Management of frozen shoulder: a systematic review and cost-effectiveness analysis. *Health Technol Asses (Winchester, England).* 2012;16(11):1–243.
6. Walker-Bone K, Palmer KT, Reading I, *et al.* Prevalence and impact of musculoskeletal disorders of the upper limb in the general population. *Arthritis Rheum.* 2004;51(4):642–51.
7. Bunker T. Time for a new name for frozen shoulder: Contracture of the shoulder. *Shoulder Elbow.* 2009;1(1):4-9.
8. Shah N, Lewis M. Shoulder adhesive capsulitis: systematic review of randomised trials using multiple corticosteroid injections. *Br J Gen Pract.* 2007;57(541):662–667.
9. Boyle-Walker KL, Gabard DL, Bietsch E, *et al.* A profile of patients with adhesive capsulitis. *J Hand Ther.* 1997;10:222–228.
10. Codman EA. *Rupture of the supraspinatus tendon and other lesions in or about the subacromial bursa.* Boston: Privately published; 1934.
11. Hanchard N, Goodchild L, Thompson J, *et al.* Evidence-based clinical guidelines for the diagnosis, assessment and physiotherapy management of contracted (frozen) shoulder. Version 1.7: “standard” physiotherapy. Endorsed by the Chartered Society of Physiotherapy. 2011. [www.csp.org.uk/skipp](http://www.csp.org.uk/skipp).
12. Hanchard NCA, Goodchild L, Thompson J, *et al.* Evidence-based clinical guidelines for the diagnosis, assessment and physiotherapy management of contracted (frozen) shoulder: quick reference summary. *Physiotherapy.* 2012;98(2):117–20. <http://dx.doi.org/10.1016/j.physio.2012.01.001>
13. Hand C, Clipsham K, Rees JL, *et al.* Long-term outcome of frozen shoulder. *J Shoulder Elb Surg.* 2008;17(2):231–6.
14. Carter B. Clients' experiences of frozen shoulder and its treatment with Bowen technique. *Compl Ther Nurs Midwifery.* 2002;8(4):204–10.

A qualitative study of patients' perceptions and priorities when living with primary frozen shoulder  
MAIN DOCUMENT (article summary, body of text, references, editable tables)  
BMJ Open amended and resubmitted following peer review – 16/8/13

15. Hush JM, Cameron K, Mackey M. Patient satisfaction with musculoskeletal physical therapy care: a systematic review. *Phys Ther*. 2011;91(1):25-36.
16. Rookmoneea M, Dennis L, Brealey S, *et al*. The effectiveness of interventions in the management of patients with primary frozen shoulder. *J Bone Joint Surg Br*. 2010;92(9):1267–72.
17. Patton MQ. Qualitative research and evaluation methods (3rd ed.). 2002. Thousand Oaks, CA: Sage.
18. Jack B. Giving them a voice: the value of qualitative research. *Nurse Researcher*. 2010; 17(3):4-6.
19. Braun V, Clarke V. Using thematic analysis in psychology. *Qual Res Psychol*. 2006;3(2):77–101.
20. Jones SE, Hamilton S, Perry L, *et al*. Developing workable research methods: lessons from a pilot study with vulnerable participants and complex assessments. *J Res Nurs*. 2011;16(4):307-318.
21. Depoy E, Gitlin LN. *Introduction to Research: Understanding and Applying Multiple Strategies*. 4th ed. St Louis: Elsevier Mosby; 2005:368.
22. Linsell L, Dawson J, Zondervan K, *et al*. Prevalence and incidence of adults consulting for shoulder conditions in UK primary care; patterns of diagnosis and referral. *Rheumatology (Oxford, England)*. 2006;45(2):215–221.
23. Wofford JL, Mansfield RJ, Watkins RS. Patient characteristics and clinical management of patients with shoulder pain in U.S. primary care settings: secondary data analysis of the National Ambulatory Medical Care Survey. *BMC Musculoskel Dis*. 2005;6:4.  
<http://www.pubmedcentral.nih.gov/articlerender.fcgi?artid=549528&tool=pmcentrez&rendertype=abstract>
24. Solbjør M, Skolbekken J, Sætnan AR, *et al*. Could screening participation bias symptom interpretation? An interview study on women's interpretations of and responses to cancer symptoms between mammography screening rounds. *BMJ Open* 2012;2:e001508 doi:10.1136/bmjopen-2012-001508
25. Department of Health. *Cancer Reform Strategy*. 2007.  
[http://www.dh.gov.uk/en/Publicationsandstatistics/Publications/PublicationsPolicyAndGuidance/dh\\_081006](http://www.dh.gov.uk/en/Publicationsandstatistics/Publications/PublicationsPolicyAndGuidance/dh_081006)
26. National Patient Safety Agency. Delayed diagnosis of cancer: Thematic review March 2010.  
[http://www.ntac.nhs.uk/web/FILES/BreastLymphNode/nhs\\_\\_1281947508\\_Delayed\\_Diagnosis\\_of\\_Cancer\\_in.pdf](http://www.ntac.nhs.uk/web/FILES/BreastLymphNode/nhs__1281947508_Delayed_Diagnosis_of_Cancer_in.pdf)
27. Pavey A, Allen-Collinson J, Pavey T. The Lived Experience of Diagnosis Delivery in Motor Neurone Disease: A Sociological-Phenomenological Study. *Sociological*

1 A qualitative study of patients' perceptions and priorities when living with primary frozen shoulder  
2 MAIN DOCUMENT (article summary, body of text, references, editable tables)  
3 BMJ Open amended and resubmitted following peer review – 16/8/13  
4 *Research Online*, 2013;18(2)11. <http://www.socresonline.org.uk/18/2/11.html>  
5 10.5153/sro.2927

6  
7 28. Bury MR. Chronic illness as biographical disruption. *Sociol Health Ill.*  
8 1982;4(2):167-82.

9  
10 29. Binder AI, Bulgen DY, Hazleman BL, *et al.* Frozen shoulder: a long-term  
11 prospective study. *Ann Rheum Dis.* 1984;43(3):361–4.

12  
13 30. Department of Health. Guidance on the routine collection of Patient Reported  
14 Outcome Measures (PROMs). 2008.  
15 <http://www.mstrust.org.uk/competencies/downloads/NHS-PROMS.pdf>  
16

17  
18  
19  
20  
21  
22  
23  
24  
25  
26  
27  
28  
29  
30  
31  
32  
33  
34  
35  
36  
37  
38  
39  
40  
41  
42  
43  
44  
45  
46  
47  
48  
49  
50  
51  
52  
53  
54  
55  
56  
57  
58  
59  
60

Or peer review only

1  
2  
3  
4  
5  
6  
7  
8  
9  
10  
11  
12  
13  
14  
15  
16  
17  
18  
19  
20  
21  
22  
23  
24  
25  
26  
27  
28  
29  
30  
31  
32  
33  
34  
35  
36  
37  
38  
39  
40  
41  
42  
43  
44  
45  
46  
47  
48  
49

A qualitative study of patients' perceptions and priorities when living with primary frozen shoulder  
MAIN DOCUMENT (article summary, body of text, references, editable tables)  
BMJ Open amended and resubmitted following peer review – 16/8/13

Table 1: Participants' characteristics

| Participant number | Age in years | Gender | Diabetic | Group | Dominance of affected side at time of study* | Length of time from onset to 1 <sup>st</sup> consultation | Length of time from 1 <sup>st</sup> consultation to referral to MSK specialist | Where physiotherapy treatment was given                                                 |
|--------------------|--------------|--------|----------|-------|----------------------------------------------|-----------------------------------------------------------|--------------------------------------------------------------------------------|-----------------------------------------------------------------------------------------|
| 1                  | 60-69        | Female | No       | 1     | D                                            | Within 3 months                                           | 3 months                                                                       | Own practice - physiotherapist with MSK interest                                        |
| 2                  | 50-59        | Female | No       | 1 & 2 | ND & D                                       | Immediate<br>Within 2 months                              | Immediate<br>22 months                                                         | MSK community clinic<br>GP at own practice (not referred to MSK specialist)             |
| 3                  | 50-59        | Female | No       | 1     | D                                            | Within 2 months                                           | 0 months                                                                       | Own practice - physiotherapist with MSK interest                                        |
| 4                  | 50-59        | Female | No       | 2     | ND                                           | Unknown                                                   | Unknown                                                                        | Own practice physiotherapist (not referred to MSK specialist)                           |
| 5                  | 50-59        | Male   | No       | 2     | D                                            | Within 1 month                                            | 5 months                                                                       | Hospital MSK clinic                                                                     |
| 6                  | 40-49        | Male   | Yes      | 2     | D                                            | Within 2 months                                           | 3 months                                                                       | Occupational health physiotherapist<br>Own practice - physiotherapist with MSK interest |
| 7                  | 50-59        | Female | No       | 1     | ND                                           | Approx 5 months                                           | 0 months                                                                       | MSK community clinic                                                                    |
| 8                  | Over 70      | Male   | No       | 1     | D                                            | Within 3 months                                           | 0 months                                                                       | Own practice - physiotherapist with MSK interest                                        |
| 10                 | 50-59        | Female | No       | 2     | ND                                           | Within 2 months                                           | 6 months                                                                       | Generalist physiotherapist<br>MSK hospital clinic                                       |
| 11                 | 50-59        | Male   | Yes      | 3     | ND                                           | Within 2 months                                           | 8 months                                                                       | MSK hospital clinic                                                                     |
| 12                 | 50-59        | Male   | Yes      | 3     | ND                                           | Within 1 month                                            | 16 months                                                                      | Occupational health physiotherapist<br>MSK hospital clinic                              |

\* D = Dominant; ND = non-dominant. Notes: Participant 9 did not return calls/emails. Data in table derived from interviews with patients, medical records not accessed.
